# Supplementary material for: Central Arctic Ocean paleoceanography from ~ 50 ka to present, on the basis of ostracode faunal assemblages from SWERUS 2014 expedition
Source: Copernicus journal article supplement (doi:10.5194/cp-2017-22), 2017-03-28

|        | interval | avg depth | AGE (ka) | <i>Acetabulastoma arcticum</i> Schornik | <i>Argilloecia</i> spp. | <i>Bythocythere constricta</i> Sars 1866 | <i>Bythoceratina scaberrima</i> (Brady 1862) | <i>Cluthia cluthae</i> (Brady, Crosskey & Brady 1901) | <i>Cluthia whatleyi</i> Yasuhara, Stepanov & Shumakov 1987 | <i>Cytheretta teshekpukensis</i> Swain 1965 | <i>Cytheromorpha macchesneyi</i> (Brady 1862) | <i>Cytheropteron arcuatum</i> Brady, Crosskey & Brady 1901 | <i>Cytheropteron higashikawai</i> Ishizaki & Shumakov 1987 | <i>Cytheropteron inflatum</i> Brady, Crosskey & Brady 1901 |
|--------|----------|-----------|----------|-----------------------------------------|-------------------------|------------------------------------------|----------------------------------------------|-------------------------------------------------------|------------------------------------------------------------|---------------------------------------------|-----------------------------------------------|------------------------------------------------------------|------------------------------------------------------------|------------------------------------------------------------|
| 32-MC4 | 0-1      | 0.5       | 0.5745   | 6.5                                     | 0.5                     | 3                                        | 0                                            | 0                                                     | 5.3                                                        | 0                                           | 0                                             | 0                                                          | 1.4                                                        | 0                                                          |
| 32-MC4 | 1-2      | 1.5       | 1.6882   | 11                                      | 0.4                     | 2.7                                      | 0                                            | 0                                                     | 7.8                                                        | 0                                           | 0                                             | 0.2                                                        | 0.4                                                        | 0                                                          |
| 32-MC4 | 2-3      | 2.5       | 2.8018   | 8.7                                     | 1.4                     | 2.3                                      | 0                                            | 0                                                     | 13                                                         | 0                                           | 0                                             | 0                                                          | 1.4                                                        | 0                                                          |
| 32-MC4 | 3-4      | 3.5       | 4.4705   | 8.7                                     | 1.8                     | 2.6                                      | 0                                            | 0                                                     | 14                                                         | 0                                           | 0                                             | 0                                                          | 2.4                                                        | 0                                                          |
| 32-MC4 | 4-5      | 4.5       | 6.1393   | 8                                       | 4.9                     | 1.2                                      | 0                                            | 0                                                     | 9.4                                                        | 0                                           | 0                                             | 0                                                          | 2.1                                                        | 0                                                          |
| 32-MC4 | 5-6      | 5.5       | 7.971    | 7                                       | 8.4                     | 2.6                                      | 0                                            | 0                                                     | 1.8                                                        | 0.1                                         | 0                                             | 0                                                          | 1                                                          | 0                                                          |
| 32-MC4 | 6-7      | 6.5       | 8.109    | 3.3                                     | 7                       | 2.3                                      | 0                                            | 0                                                     | 6.3                                                        | 0                                           | 0                                             | 0                                                          | 1.7                                                        | 0                                                          |
| 32-MC4 | 7-8      | 7.5       | 8.247    | 4.1                                     | 4.6                     | 2.4                                      | 0                                            | 0                                                     | 11                                                         | 0                                           | 0                                             | 0                                                          | 1.6                                                        | 0                                                          |
| 32-MC4 | 8-9      | 8.5       | 8.385    | 3.3                                     | 5                       | 0.7                                      | 0                                            | 0                                                     | 7.7                                                        | 0                                           | 0                                             | 0                                                          | 2.3                                                        | 0                                                          |
| 32-MC4 | 9-10     | 9.5       | 9.5334   | 2.7                                     | 2                       | 1.7                                      | 0                                            | 0                                                     | 3.3                                                        | 0                                           | 0.3                                           | 0                                                          | 2.7                                                        | 0                                                          |
| 32-MC4 | 10-11    | 10.5      | 10.682   | 1.3                                     | 3.9                     | 0                                        | 0                                            | 0                                                     | 5.2                                                        | 0                                           | 0                                             | 0                                                          | 2.6                                                        | 0                                                          |
| 32-MC4 | 11-12    | 11.5      | 11.83    | 0.5                                     | 2.5                     | 0.5                                      | 0                                            | 0                                                     | 1                                                          | 0                                           | 0.5                                           | 0                                                          | 3.8                                                        | 0                                                          |
| 32-MC4 | 12-13    | 12.5      | 12.014   | 0.2                                     | 4.8                     | 0.9                                      | 0                                            | 0                                                     | 0                                                          | 0                                           | 0.4                                           | 0                                                          | 3.7                                                        | 0                                                          |
| 32-MC4 | 13-14    | 13.5      | 12.197   | 0.7                                     | 2                       | 1.7                                      | 0.7                                          | 0                                                     | 0                                                          | 0                                           | 0.3                                           | 0                                                          | 3.6                                                        | 0                                                          |
| 32-MC4 | 14-15    | 14.5      | 12.38    | 1                                       | 2.3                     | 0.7                                      | 0.3                                          | 0                                                     | 0                                                          | 0                                           | 0.3                                           | 0                                                          | 1                                                          | 0                                                          |
| 32-MC4 | 15-16    | 15.5      | 14.232   | 0.3                                     | 2.6                     | 1                                        | 0.3                                          | 0                                                     | 0                                                          | 0                                           | 0                                             | 0                                                          | 2.6                                                        | 0                                                          |
| 32-MC4 | 16-17    | 16.5      | 16.083   | 0.3                                     | 1.3                     | 3.7                                      | 0                                            | 0                                                     | 0                                                          | 0                                           | 0                                             | 0                                                          | 0.7                                                        | 0                                                          |

|        |       |      |        |     |     |     |     |   |     |   |     |   |     |     |
|--------|-------|------|--------|-----|-----|-----|-----|---|-----|---|-----|---|-----|-----|
| 32-MC4 | 17-18 | 17.5 | 17.934 | 1.4 | 0.5 | 3.8 | 0   | 0 | 0.2 | 0 | 0   | 0 | 1.4 | 0   |
| 32-MC4 | 18-19 | 18.5 | 19.785 | 1.7 | 0.3 | 1.7 | 0   | 0 | 0   | 0 | 0   | 0 | 0.7 | 0   |
| 32-MC4 | 19-20 | 19.5 | 21.637 | 5.2 | 0   | 2.6 | 0.7 | 0 | 0   | 0 | 0.3 | 0 | 1.3 | 0   |
| 32-MC4 | 20-21 | 20.5 | 23.794 | 3.3 | 0.3 | 2.9 | 0   | 0 | 0   | 0 | 0   | 0 | 2.3 | 0   |
| 32-MC4 | 21-22 | 21.5 | 25.951 | 1.5 | 0.3 | 3.9 | 0.3 | 0 | 0   | 0 | 0   | 0 | 0.6 | 0   |
| 32-MC4 | 22-23 | 22.5 | 28.108 | 1.6 | 0.2 | 4   | 0.2 | 0 | 0   | 0 | 0   | 0 | 0   | 0   |
| 32-MC4 | 23-24 | 23.5 | 30.266 | 0.6 | 0   | 6.1 | 0.9 | 0 | 0.3 | 0 | 0   | 0 | 0.6 | 0   |
| 32-MC4 | 24-25 | 24.5 | 32.423 | 3.1 | 0   | 2.2 | 0.7 | 0 | 0   | 0 | 0   | 0 | 0.3 | 0.1 |
| 32-MC4 | 25-26 | 25.5 | 33.449 | 3.2 | 0   | 4.6 | 0   | 0 | 0   | 0 | 0   | 0 | 0   | 0   |
| 32-MC4 | 26-27 | 26.5 | 34.476 | 2.3 | 0   | 2.7 | 0   | 0 | 0   | 0 | 0   | 0 | 0   | 0   |
| 32-MC4 | 27-28 | 27.5 | 35.502 | 1.8 | 0   | 1.4 | 0.2 | 0 | 0   | 0 | 0   | 0 | 0.4 | 0   |
| 32-MC4 | 28-29 | 28.5 | 36.528 | 4.6 | 0   | 2.2 | 0.4 | 0 | 0   | 0 | 0   | 0 | 0   | 0   |
| 32-MC4 | 29-30 | 29.5 | 37.555 | 7.6 | 0.3 | 0   | 0.3 | 0 | 0   | 0 | 0   | 0 | 0   | 0   |
| 32-MC4 | 30-31 | 30.5 | 38.581 | 5.3 | 0   | 0.8 | 0.2 | 0 | 0.2 | 0 | 0   | 0 | 0   | 0   |
| 32-MC4 | 31-32 | 31.5 | 39.607 | 4.9 | 0   | 1.3 | 0   | 0 | 0.7 | 0 | 0   | 0 | 0   | 0   |

| <i>Cytheropteron parahamatum</i> Yasutake 1965 | <i>Cytheropteron scoresbyi</i> Whatley and Jones 1965 | <i>Cytheropteron sedovi</i> Schneider 1965 | <i>Cytheropteron suzdalskyi</i> Lev 1972 | <i>Cytheropteron</i> spp. | Cytheropteron TOTAL | <i>Eucythere</i> sp. | <i>Eucytherurua delineata</i> Whatley and Jones 1965 | <i>Heterocyprideis fascis</i> (Brady and Norman) 1965 | <i>Heterocyprideis sorbyana</i> (Jones 1965) | <i>Krithe hunti</i> Yasuhara, Stepanova, and Jones 1965 | <i>Krithe minima</i> Coles, Whatley, & Moore 1965 | <i>Microcythere medistriata</i> (Joy and Jones) 1965 | <i>Paracythero</i> is spp. | <i>Pedicythere</i> spp. | <i>Polycop</i> e spp. | <i>Propontocypris</i> sp. | <i>Pseudocythere caudata</i> Sars 1866 |
|------------------------------------------------|-------------------------------------------------------|--------------------------------------------|------------------------------------------|---------------------------|---------------------|----------------------|------------------------------------------------------|-------------------------------------------------------|----------------------------------------------|---------------------------------------------------------|---------------------------------------------------|------------------------------------------------------|----------------------------|-------------------------|-----------------------|---------------------------|----------------------------------------|
| 1.3                                            | 9.4                                                   | 0.3                                        | 0                                        | 0.1                       | 13                  | 0                    | 0                                                    | 0                                                     | 0                                            | 1.4                                                     | 0                                                 | 0.7                                                  | 0.9                        | 0.3                     | 58                    | 1.4                       | 1.5                                    |
| 1.1                                            | 10                                                    | 0                                          | 0                                        | 0                         | 12                  | 0                    | 0                                                    | 0                                                     | 0                                            | 2.1                                                     | 0                                                 | 0.8                                                  | 3.6                        | 0                       | 50                    | 0.6                       | 0.6                                    |
| 2.6                                            | 18                                                    | 0                                          | 0                                        | 0                         | 21                  | 0                    | 0                                                    | 0                                                     | 0                                            | 2.1                                                     | 0                                                 | 0.2                                                  | 6.8                        | 1                       | 29                    | 1.7                       | 1.6                                    |
| 4.7                                            | 14                                                    | 0                                          | 0                                        | 0                         | 21                  | 0                    | 0                                                    | 0                                                     | 0                                            | 1                                                       | 0                                                 | 0.8                                                  | 8.1                        | 0.4                     | 24                    | 0.4                       | 1                                      |
| 6.8                                            | 25                                                    | 0                                          | 0                                        | 0                         | 33                  | 0.2                  | 0                                                    | 0                                                     | 0                                            | 2.4                                                     | 0                                                 | 0                                                    | 5.2                        | 0.2                     | 14                    | 1.4                       | 1.9                                    |
| 7.8                                            | 17                                                    | 0                                          | 0                                        | 0                         | 26                  | 0                    | 0                                                    | 0                                                     | 0                                            | 3.1                                                     | 0                                                 | 0.1                                                  | 7.3                        | 0.9                     | 18                    | 0.1                       | 0.9                                    |
| 6.6                                            | 12                                                    | 0.3                                        | 0                                        | 0                         | 20                  | 0                    | 0                                                    | 0                                                     | 0                                            | 7.6                                                     | 0                                                 | 0                                                    | 6.6                        | 1                       | 9.9                   | 0                         | 1.3                                    |
| 8.9                                            | 13                                                    | 0.3                                        | 0                                        | 0                         | 24                  | 0                    | 0                                                    | 0                                                     | 0                                            | 6.8                                                     | 0.8                                               | 0.3                                                  | 6.8                        | 0.5                     | 9.2                   | 0                         | 1.1                                    |
| 8                                              | 9.3                                                   | 0                                          | 0                                        | 0                         | 20                  | 0                    | 0                                                    | 0                                                     | 0                                            | 7.3                                                     | 2                                                 | 0                                                    | 2                          | 0                       | 8.7                   | 0                         | 1.3                                    |
| 15                                             | 13                                                    | 0                                          | 0                                        | 0                         | 30                  | 0                    | 0                                                    | 0                                                     | 0                                            | 9                                                       | 0                                                 | 0                                                    | 2.7                        | 0.3                     | 13                    | 0.3                       | 1.3                                    |
| 24                                             | 8.5                                                   | 0                                          | 0                                        | 0                         | 36                  | 0                    | 0                                                    | 0                                                     | 0                                            | 5.9                                                     | 0                                                 | 0.3                                                  | 6.2                        | 0.7                     | 21                    | 1.6                       | 1.6                                    |
| 17                                             | 14                                                    | 0.5                                        | 0                                        | 0                         | 36                  | 0                    | 0                                                    | 0                                                     | 0                                            | 1                                                       | 0                                                 | 1.8                                                  | 1.8                        | 2                       | 46                    | 1                         | 2                                      |
| 12                                             | 13                                                    | 1.1                                        | 0                                        | 0                         | 30                  | 0                    | 0                                                    | 0                                                     | 0                                            | 0                                                       | 0                                                 | 2.2                                                  | 3.5                        | 2.2                     | 48                    | 0.9                       | 4.6                                    |
| 11                                             | 10                                                    | 3                                          | 0                                        | 0                         | 28                  | 0                    | 0                                                    | 0                                                     | 0                                            | 0.3                                                     | 0                                                 | 5                                                    | 0.7                        | 2                       | 49                    | 1                         | 9.6                                    |
| 5                                              | 8.9                                                   | 2.3                                        | 0                                        | 0                         | 17                  | 0                    | 0                                                    | 0                                                     | 0                                            | 0.3                                                     | 0                                                 | 1.3                                                  | 3.3                        | 2.6                     | 57                    | 0.7                       | 12                                     |
| 3.1                                            | 7.2                                                   | 4.9                                        | 0                                        | 0                         | 18                  | 0                    | 0                                                    | 0                                                     | 0                                            | 0.5                                                     | 0                                                 | 2.8                                                  | 2.1                        | 2.3                     | 56                    | 0.5                       | 14                                     |
| 3.3                                            | 6.3                                                   | 13                                         | 0                                        | 0                         | 24                  | 0                    | 0                                                    | 0                                                     | 0                                            | 1                                                       | 0                                                 | 4                                                    | 2.7                        | 0.7                     | 58                    | 0.3                       | 4.3                                    |

|     |     |     |     |     |    |     |   |     |   |     |   |     |     |     |    |     |     |
|-----|-----|-----|-----|-----|----|-----|---|-----|---|-----|---|-----|-----|-----|----|-----|-----|
| 1.6 | 6.4 | 16  | 0   | 0.2 | 26 | 0   | 0 | 0   | 0 | 0.3 | 0 | 2.4 | 0.8 | 0   | 56 | 0   | 8.8 |
| 1   | 9.6 | 17  | 0   | 0.3 | 29 | 0   | 0 | 0   | 0 | 0.3 | 0 | 5.3 | 1   | 0.3 | 59 | 0.3 | 1   |
| 0   | 6.2 | 12  | 0   | 0   | 19 | 0   | 0 | 0   | 0 | 0.3 | 0 | 2.6 | 0   | 1.6 | 65 | 0   | 1.6 |
| 2.3 | 17  | 12  | 0   | 0   | 34 | 0   | 0 | 0   | 0 | 0.3 | 0 | 5.6 | 0.7 | 2.3 | 47 | 0   | 2.9 |
| 1.8 | 9.8 | 11  | 0   | 0   | 23 | 0   | 0 | 0   | 0 | 0.6 | 0 | 5.4 | 2.4 | 1.2 | 58 | 0   | 3   |
| 0.4 | 11  | 13  | 0   | 0   | 25 | 0   | 0 | 0   | 0 | 0.4 | 0 | 6.9 | 0.2 | 2.7 | 57 | 0   | 0   |
| 0   | 8.1 | 11  | 0   | 0   | 20 | 0   | 0 | 0   | 0 | 0.6 | 0 | 3.8 | 0   | 4   | 52 | 0   | 10  |
| 0.3 | 9.6 | 9.3 | 0   | 0.1 | 20 | 0   | 0 | 0   | 0 | 0.3 | 0 | 5   | 0.6 | 1.6 | 54 | 0.1 | 12  |
| 0.5 | 12  | 11  | 0   | 0.5 | 24 | 0   | 0 | 0.2 | 0 | 1.1 | 0 | 3.4 | 2.3 | 2.7 | 47 | 0   | 11  |
| 0   | 9.3 | 16  | 0   | 0.3 | 25 | 0   | 0 | 0   | 0 | 1.7 | 0 | 4.7 | 0.3 | 0.7 | 57 | 0.3 | 3.7 |
| 0   | 7.6 | 11  | 0   | 0   | 19 | 0.2 | 0 | 0   | 0 | 2.8 | 0 | 5.4 | 0.2 | 1.6 | 64 | 0.8 | 0.8 |
| 0   | 5.2 | 11  | 0   | 0   | 16 | 0   | 0 | 0   | 0 | 4.2 | 0 | 4.8 | 0   | 0.4 | 61 | 0.4 | 2   |
| 0.7 | 9.3 | 19  | 0   | 0   | 29 | 0.3 | 0 | 0   | 0 | 6.6 | 0 | 7.9 | 0   | 0.3 | 39 | 0.3 | 2   |
| 0   | 2.1 | 9   | 0.2 | 0   | 11 | 0   | 0 | 0   | 0 | 7.6 | 0 | 6.9 | 1   | 0.5 | 56 | 0.2 | 1.2 |
| 0   | 2.6 | 13  | 0   | 0   | 16 | 0.3 | 0 | 0   | 0 | 7.8 | 0 | 6.2 | 1.3 | 0.3 | 44 | 0.3 | 0.7 |

| <i>Rabillimis mirabilis</i> (Brady 1868) | <i>Sarsicytheridea bradii</i> (Norman 186 | <i>Sclerochilus</i> spp. | <i>Semicytherura complanata</i> (Brady, | <i>Semicytherura</i> spp. | Other | Indeterminate/IRO | Total | Total species count | Confidence limits | <i>Acetabulastoma arcticum</i> Schornik | <i>Argilloecia</i> spp. | <i>Bythocythere constricta</i> Sars 1866 | <i>Bythoceratina scaberrima</i> (Brady 18 | <i>Cluthia cluthae</i> (Brady, Crosskey & | <i>Cluthia whatleyi</i> Yasuhara, Stepano | <i>Cytheretta teshekpukensis</i> Swain 19 | <i>Cytheromorpha macchesneyi</i> (Brad |
|------------------------------------------|-------------------------------------------|--------------------------|-----------------------------------------|---------------------------|-------|-------------------|-------|---------------------|-------------------|-----------------------------------------|-------------------------|------------------------------------------|-------------------------------------------|-------------------------------------------|-------------------------------------------|-------------------------------------------|----------------------------------------|
| 6.8                                      | 0                                         | 0                        | 0                                       | 0                         | 0.7   | 0                 | 100   | 864                 |                   | 1.6                                     | 0.5                     | 1.1                                      | 0                                         | 0                                         | 1.5                                       | 0                                         | 0                                      |
| 7.8                                      | 0                                         | 0                        | 0                                       | 0                         | 0.2   | 0                 | 100   | 527                 |                   | 2.7                                     | 0.5                     | 1.4                                      | 0                                         | 0                                         | 2.3                                       | 0                                         | 0                                      |
| 9                                        | 0                                         | 0                        | 0                                       | 0                         | 1.2   | 0                 | 100   | 577                 |                   | 2.3                                     | 1                       | 1.2                                      | 0                                         | 0                                         | 2.8                                       | 0                                         | 0                                      |
| 15                                       | 0                                         | 0                        | 0                                       | 0                         | 0.4   | 0                 | 100   | 493                 |                   | 2.5                                     | 1.2                     | 1.4                                      | 0                                         | 0                                         | 3.1                                       | 0                                         | 0                                      |
| 17                                       | 0                                         | 0                        | 0                                       | 0                         | 0.9   | 0                 | 100   | 577                 |                   | 2.2                                     | 1.8                     | 0.9                                      | 0                                         | 0                                         | 2.4                                       | 0                                         | 0                                      |
| 23                                       | 0.1                                       | 0                        | 0                                       | 0                         | 0.4   | 0                 | 100   | 682                 |                   | 1.9                                     | 2.1                     | 1.2                                      | 0                                         | 0                                         | 1                                         | 0.3                                       | 0                                      |
| 34                                       | 0                                         | 0                        | 0                                       | 0                         | 0     | 0                 | 100   | 302                 |                   | 2                                       | 2.9                     | 1.7                                      | 0                                         | 0                                         | 2.7                                       | 0                                         | 0                                      |
| 28                                       | 0                                         | 0                        | 0                                       | 0                         | 0     | 0                 | 100   | 369                 |                   | 2                                       | 2.1                     | 1.6                                      | 0                                         | 0                                         | 3.2                                       | 0                                         | 0                                      |
| 41                                       | 0                                         | 0                        | 0                                       | 0                         | 1.7   | 0                 | 100   | 300                 |                   | 2                                       | 2.5                     | 0.9                                      | 0                                         | 0                                         | 3                                         | 0                                         | 0                                      |
| 33                                       | 0                                         | 0                        | 0                                       | 0                         | 0.3   | 0                 | 100   | 301                 |                   | 1.8                                     | 1.6                     | 1.4                                      | 0                                         | 0                                         | 2                                         | 0                                         | 0.7                                    |
| 16                                       | 0                                         | 0                        | 0                                       | 0                         | 1.3   | 0                 | 100   | 307                 |                   | 1.3                                     | 2.2                     | 0                                        | 0                                         | 0                                         | 2.5                                       | 0                                         | 0                                      |
| 3                                        | 0                                         | 0                        | 0                                       | 0                         | 0.5   | 0                 | 100   | 396                 |                   | 0.7                                     | 1.5                     | 0.7                                      | 0                                         | 0                                         | 1                                         | 0                                         | 0.7                                    |
| 2.2                                      | 0                                         | 0                        | 0                                       | 0                         | 0     | 0                 | 100   | 460                 |                   | 0.4                                     | 2                       | 0.8                                      | 0                                         | 0                                         | 0                                         | 0                                         | 0.6                                    |
| 0                                        | 0                                         | 0                        | 0                                       | 0                         | 0     | 0                 | 100   | 303                 |                   | 0.9                                     | 1.6                     | 1.4                                      | 0.9                                       | 0                                         | 0                                         | 0                                         | 0.6                                    |
| 0                                        | 0.3                                       | 0                        | 0                                       | 0                         | 0     | 0                 | 100   | 303                 |                   | 1.1                                     | 1.7                     | 0.9                                      | 0.6                                       | 0                                         | 0                                         | 0                                         | 0.6                                    |
| 0                                        | 0                                         | 0                        | 0                                       | 0                         | 0     | 0                 | 100   | 389                 |                   | 0.5                                     | 1.6                     | 1                                        | 0.5                                       | 0                                         | 0                                         | 0                                         | 0                                      |
| 0.3                                      | 0                                         | 0                        | 0                                       | 0                         | 0     | 0                 | 100   | 300                 |                   | 0.7                                     | 1.3                     | 2.1                                      | 0                                         | 0                                         | 0                                         | 0                                         | 0                                      |

|     |   |     |     |     |     |   |     |      |  |     |     |     |     |   |     |   |     |
|-----|---|-----|-----|-----|-----|---|-----|------|--|-----|-----|-----|-----|---|-----|---|-----|
| 0   | 0 | 0   | 0   | 0   | 0   | 0 | 100 | 625  |  | 0.9 | 0.5 | 1.5 | 0   | 0 | 0.3 | 0 | 0   |
| 0.3 | 0 | 0   | 0   | 0   | 0   | 0 | 100 | 301  |  | 1.4 | 0.7 | 1.4 | 0   | 0 | 0   | 0 | 0   |
| 0   | 0 | 0   | 0   | 0   | 0.3 | 0 | 100 | 306  |  | 2.5 | 0   | 1.8 | 0.9 | 0 | 0   | 0 | 0.6 |
| 0   | 0 | 0   | 0   | 0   | 0.7 | 0 | 100 | 306  |  | 2   | 0.6 | 1.9 | 0   | 0 | 0   | 0 | 0   |
| 0   | 0 | 0   | 0   | 0   | 0   | 0 | 100 | 336  |  | 1.3 | 0.6 | 2.1 | 0.6 | 0 | 0   | 0 | 0   |
| 0   | 0 | 0   | 0   | 0   | 1.6 | 0 | 100 | 447  |  | 1.2 | 0.4 | 1.8 | 0.4 | 0 | 0   | 0 | 0   |
| 0.9 | 0 | 0   | 0   | 0   | 0.6 | 0 | 100 | 346  |  | 0.8 | 0   | 2.5 | 1   | 0 | 0.6 | 0 | 0   |
| 0.3 | 0 | 0.1 | 0   | 0   | 0   | 0 | 100 | 882  |  | 1.1 | 0   | 1   | 0.5 | 0 | 0   | 0 | 0   |
| 0   | 0 | 0   | 0   | 0   | 0   | 0 | 100 | 438  |  | 1.6 | 0   | 2   | 0   | 0 | 0   | 0 | 0   |
| 1   | 0 | 0   | 0   | 0   | 0   | 0 | 100 | 301  |  | 1.7 | 0   | 1.8 | 0   | 0 | 0   | 0 | 0   |
| 1.6 | 0 | 0   | 0   | 0   | 0   | 0 | 100 | 501  |  | 1.2 | 0   | 1   | 0.4 | 0 | 0   | 0 | 0   |
| 3.8 | 0 | 0   | 0.2 | 0.4 | 0   | 0 | 100 | 502  |  | 1.8 | 0   | 1.3 | 0.6 | 0 | 0   | 0 | 0   |
| 6.3 | 0 | 0   | 0   | 0   | 0   | 0 | 100 | 302  |  | 3   | 0.6 | 0   | 0.6 | 0 | 0   | 0 | 0   |
| 8.6 | 0 | 0   | 0   | 0   | 0.1 | 0 | 100 | 1283 |  | 1.2 | 0   | 0.5 | 0.3 | 0 | 0.3 | 0 | 0   |
| 17  | 0 | 0   | 0   | 0   | 0   | 0 | 100 | 307  |  | 2.4 | 0   | 1.3 | 0   | 0 | 0.9 | 0 | 0   |

13767



|   |     |     |     |     |     |     |     |     |     |   |     |   |     |   |     |     |     |
|---|-----|-----|-----|-----|-----|-----|-----|-----|-----|---|-----|---|-----|---|-----|-----|-----|
| 0 | 0.9 | 0   | 1   | 1.9 | 2.9 | 0   | 0.3 | 3.4 | 0   | 0 | 0   | 0 | 0.4 | 0 | 1.2 | 0.7 | 0   |
| 0 | 0.9 | 0   | 1.1 | 3.3 | 4.2 | 0   | 0.7 | 5.1 | 0   | 0 | 0   | 0 | 0.7 | 0 | 2.5 | 1.1 | 0.7 |
| 0 | 1.3 | 0   | 0   | 2.7 | 3.6 | 0   | 0   | 4.4 | 0   | 0 | 0   | 0 | 0.6 | 0 | 1.8 | 0   | 1.4 |
| 0 | 1.7 | 0   | 1.7 | 4.2 | 3.7 | 0   | 0   | 5.3 | 0   | 0 | 0   | 0 | 0.6 | 0 | 2.6 | 0.9 | 1.7 |
| 0 | 0.8 | 0   | 1.4 | 3.2 | 3.3 | 0   | 0   | 4.5 | 0   | 0 | 0   | 0 | 0.8 | 0 | 2.4 | 1.6 | 1.2 |
| 0 | 0   | 0   | 0.6 | 2.9 | 3.1 | 0   | 0   | 4   | 0   | 0 | 0   | 0 | 0.6 | 0 | 2.4 | 0.4 | 1.5 |
| 0 | 0.8 | 0   | 0   | 2.9 | 3.3 | 0   | 0   | 4.2 | 0   | 0 | 0   | 0 | 0.8 | 0 | 2   | 0   | 2.1 |
| 0 | 0.4 | 0.2 | 0.4 | 1.9 | 1.9 | 0   | 0.2 | 2.6 | 0   | 0 | 0   | 0 | 0.4 | 0 | 1.4 | 0.5 | 0.8 |
| 0 | 0   | 0   | 0.6 | 3.1 | 2.9 | 0   | 0.6 | 4   | 0   | 0 | 0.4 | 0 | 1   | 0 | 1.7 | 1.4 | 1.5 |
| 0 | 0   | 0   | 0   | 3.3 | 4.1 | 0   | 0.7 | 4.9 | 0   | 0 | 0   | 0 | 1.4 | 0 | 2.4 | 0.7 | 0.9 |
| 0 | 0.6 | 0   | 0   | 2.3 | 2.7 | 0   | 0   | 3.4 | 0.4 | 0 | 0   | 0 | 1.4 | 0 | 2   | 0.4 | 1.1 |
| 0 | 0   | 0   | 0   | 1.9 | 2.7 | 0   | 0   | 3.2 | 0   | 0 | 0   | 0 | 1.8 | 0 | 1.9 | 0   | 0.6 |
| 0 | 0   | 0   | 0.9 | 3.3 | 4.4 | 0   | 0   | 5.1 | 0.6 | 0 | 0   | 0 | 2.8 | 0 | 3.1 | 0   | 0.6 |
| 0 | 0   | 0   | 0   | 0.8 | 1.6 | 0.2 | 0   | 1.7 | 0   | 0 | 0   | 0 | 1.4 | 0 | 1.4 | 0.5 | 0.4 |
| 0 | 0   | 0   | 0   | 1.8 | 3.8 | 0   | 0   | 4.1 | 0.6 | 0 | 0   | 0 | 3   | 0 | 2.7 | 1.3 | 0.6 |





|     |     |     |     |   |     |     |     |     |
|-----|-----|-----|-----|---|-----|-----|-----|-----|
| 3.9 | 0   | 2.2 | 0   | 0 | 0   | 0   | 0   | 0   |
| 5.6 | 0.7 | 1.1 | 0.7 | 0 | 0   | 0   | 0   | 0   |
| 5.3 | 0   | 1.4 | 0   | 0 | 0   | 0   | 0   | 0.6 |
| 5.6 | 0   | 1.9 | 0   | 0 | 0   | 0   | 0   | 0.9 |
| 5.3 | 0   | 1.8 | 0   | 0 | 0   | 0   | 0   | 0   |
| 4.6 | 0   | 0   | 0   | 0 | 0   | 0   | 0   | 1.2 |
| 5.3 | 0   | 3.2 | 1   | 0 | 0   | 0   | 0   | 0.8 |
| 3.3 | 0.2 | 2.2 | 0.4 | 0 | 0.2 | 0   | 0   | 0   |
| 4.7 | 0   | 3   | 0   | 0 | 0   | 0   | 0   | 0   |
| 5.6 | 0.7 | 2.1 | 1.1 | 0 | 0   | 0   | 0   | 0   |
| 4.2 | 0.8 | 0.8 | 1.1 | 0 | 0   | 0   | 0   | 0   |
| 4.3 | 0.6 | 1.2 | 1.7 | 0 | 0   | 0.4 | 0.6 | 0   |
| 5.5 | 0.6 | 1.6 | 2.7 | 0 | 0   | 0   | 0   | 0   |
| 2.7 | 0.3 | 0.6 | 1.5 | 0 | 0   | 0   | 0   | 0.2 |
| 5.5 | 0.6 | 0.9 | 4.2 | 0 | 0   | 0   | 0   | 0   |

[illegible]



[illegible]



|  |  |  |  |  |  |  |  |  |  |  |  |  |  |  |  |  |  |  |  |
|--|--|--|--|--|--|--|--|--|--|--|--|--|--|--|--|--|--|--|--|
|  |  |  |  |  |  |  |  |  |  |  |  |  |  |  |  |  |  |  |  |
|--|--|--|--|--|--|--|--|--|--|--|--|--|--|--|--|--|--|--|--|

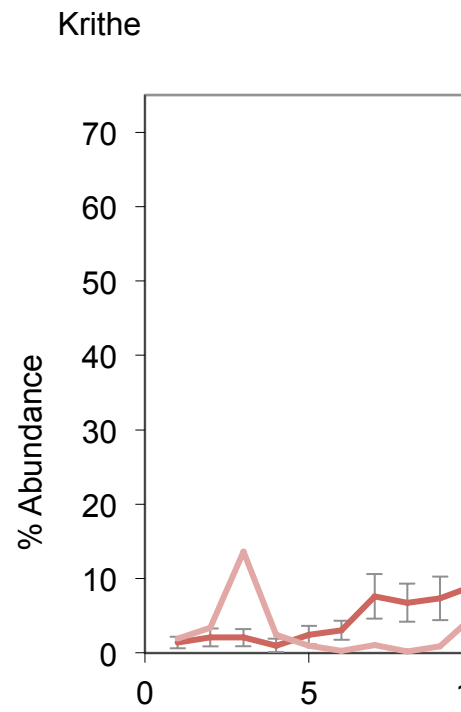

C

% Abundance

C scoresbyi

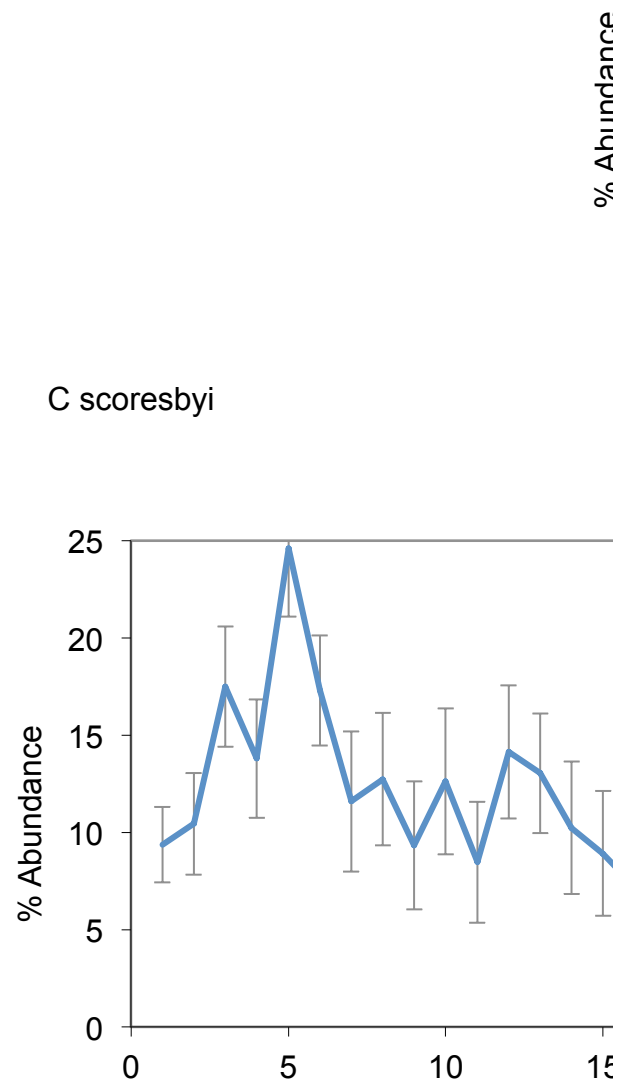



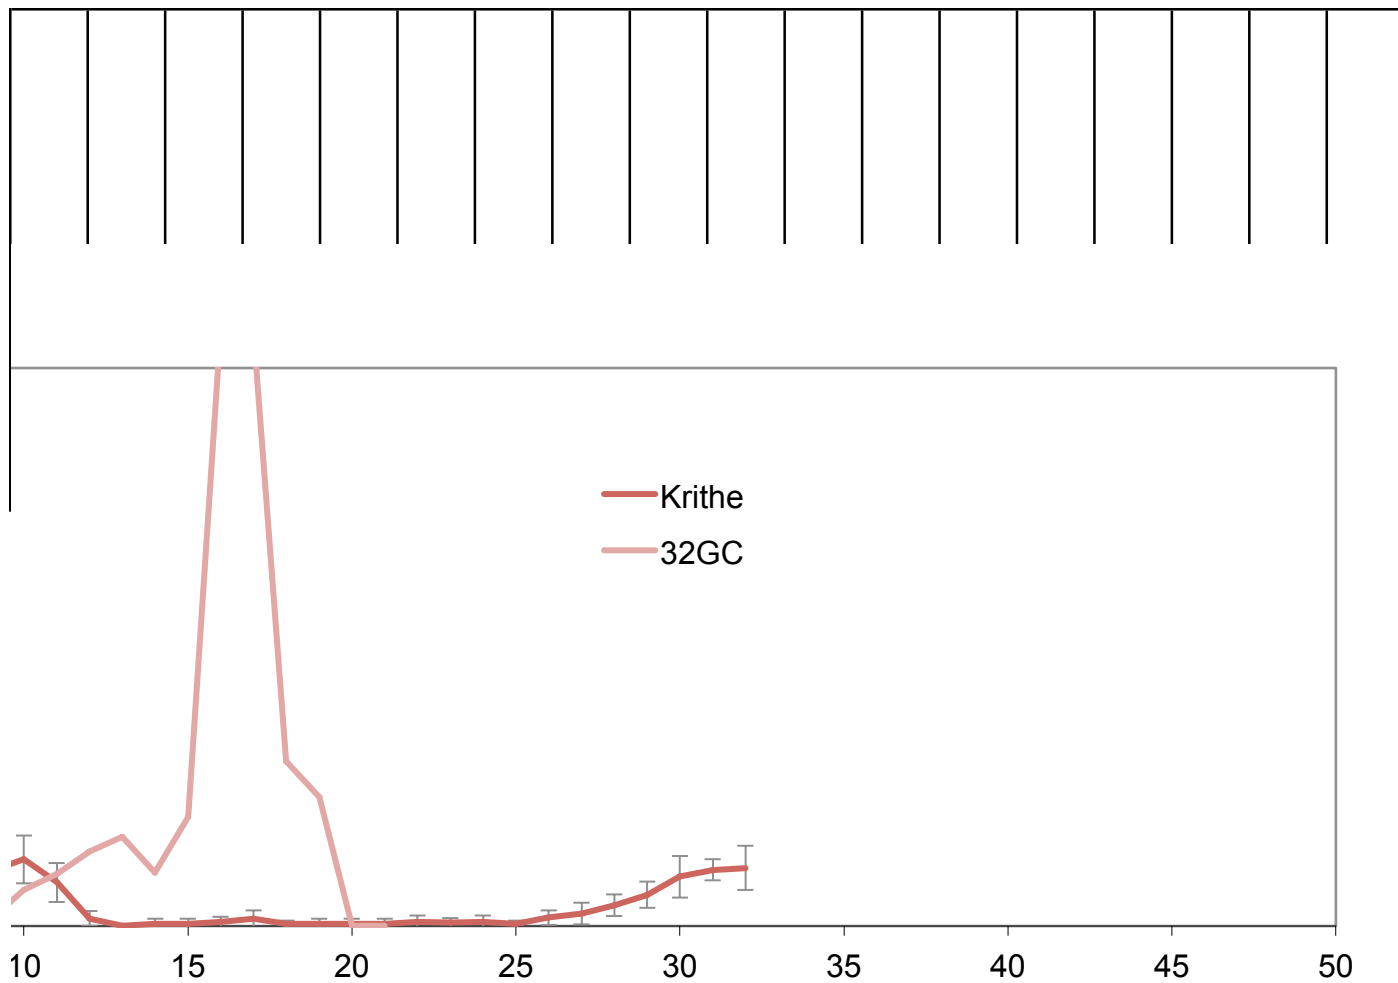

sedovi

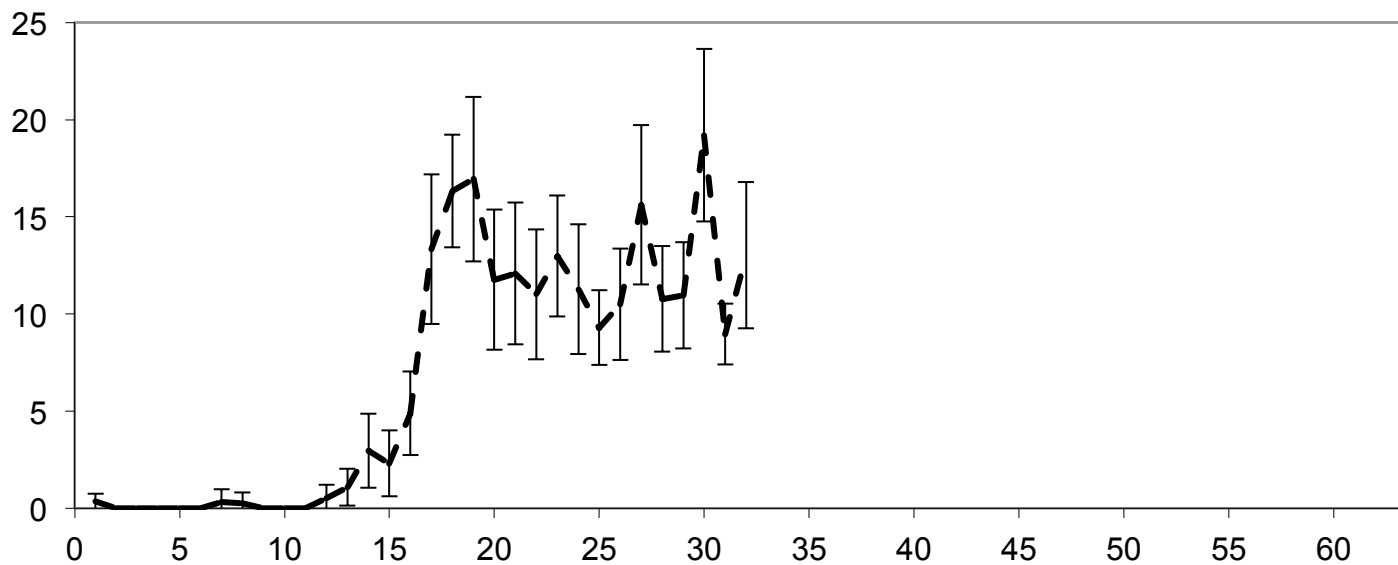

C scoresbyi

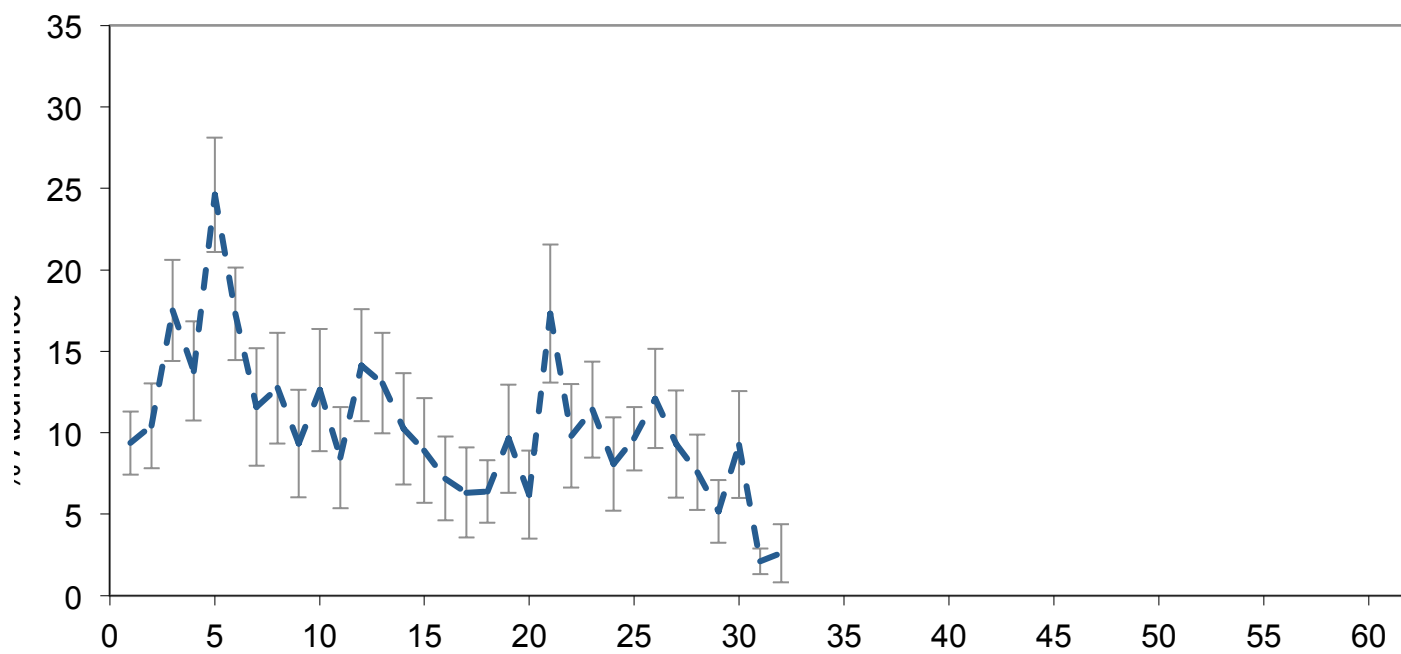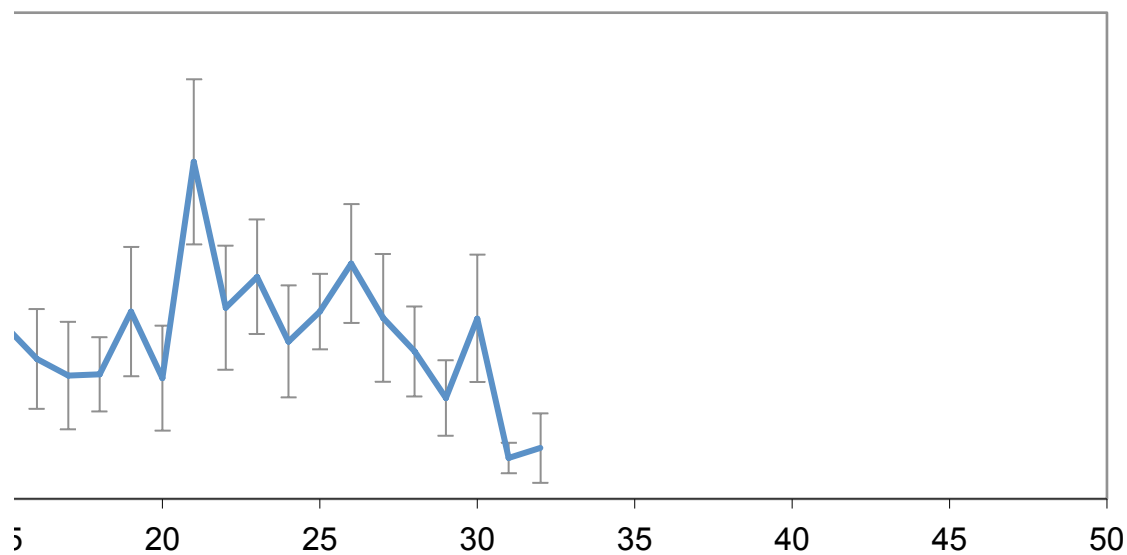

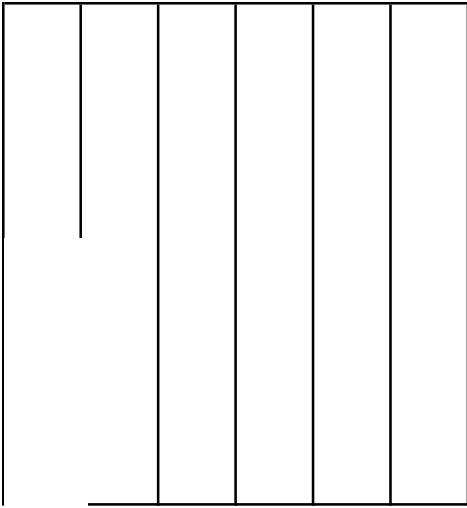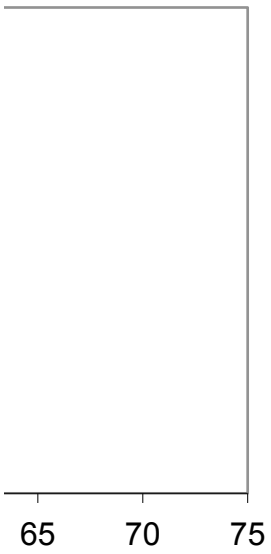

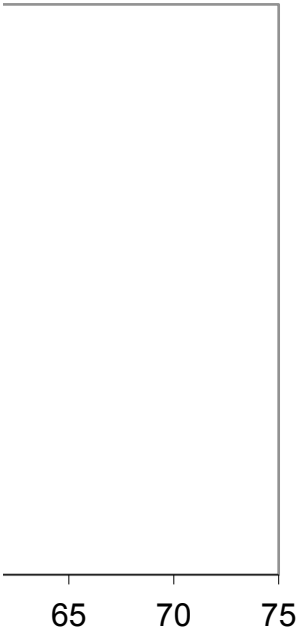

Supplement: Supplementary file 4 [file Gemery-SuppTables-32GC2-32MC S4- 32MUC4 confidence limits.pdf › Gemery-SuppTables-32GC2-32MC S4- 32MUC4 confidence limits.pdf]
