# Supplementary material for: Central Arctic Ocean paleoceanography from ~ 50 ka to present, on the basis of ostracode faunal assemblages from SWERUS 2014 expedition
Source: Copernicus journal article supplement (doi:10.5194/cp-2017-22), 2017-03-28

| 32-GC            | Section | cm (top) | cm (base) | Avg depth | ADJUSTED DEPTH based on MUC MINU | New calibrated Age from Christof 8-2016 | Total Count | PERCENT | Acanthocythereis dunelmensis (Norman | Acetabulastoma arcticum Schornikov 19 | Argilloecia spp. | Baffinicythere howei Hazel 1967 |
|------------------|---------|----------|-----------|-----------|----------------------------------|-----------------------------------------|-------------|---------|--------------------------------------|---------------------------------------|------------------|---------------------------------|
| SWERUS-L2-32-GC2 | 1       | 5        | 7         | 6         | 3                                | 3.636                                   | 52          |         | 0                                    | 11.5                                  | 0                | 0                               |
| SWERUS-L2-32-GC2 | 1       | 8        | 10        | 9         | 6                                | 8.04                                    | 59          |         | 0                                    | 3.39                                  | 0                | 0                               |
| SWERUS-L2-32-GC2 | 1       | 10       | 12        | 11        | 8                                | 8.316                                   | 22          |         | 0                                    | 0                                     | 0                | 0                               |
| SWERUS-L2-32-GC2 | 1       | 13       | 15        | 14        | 11                               | 11.26                                   | 82          |         | 0                                    | 2.44                                  | 3.66             | 0                               |
| SWERUS-L2-32-GC2 | 1       | 15       | 17        | 16        | 13                               | 12.11                                   | 495         |         | 0                                    | 0.2                                   | 1.62             | 0                               |
| SWERUS-L2-32-GC2 | 1       | 17       | 19        | 18        | 15                               | 13.31                                   | 366         |         | 0                                    | 0                                     | 0                | 0                               |
| SWERUS-L2-32-GC2 | 1       | 20       | 22        | 21        | 18                               | 18.86                                   | 187         |         | 0                                    | 2.14                                  | 0                | 0                               |
| SWERUS-L2-32-GC2 | 1       | 23       | 25        | 24        | 21                               | 24.87                                   | 474         |         | 0                                    | 0.21                                  | 0.21             | 0                               |
| SWERUS-L2-32-GC2 | 1       | 27       | 29        | 28        | 25                               | 32.94                                   | 1147        |         | 0                                    | 1.48                                  | 0                | 0                               |
| SWERUS-L2-32-GC2 | 1       | 30       | 32        | 31        | 28                               | 36.02                                   | 186         |         | 0                                    | 1.61                                  | 0                | 0                               |
| SWERUS-L2-32-GC2 | 1       | 33       | 35        | 34        | 31                               | 39.09                                   | 558         |         | 0                                    | 4.48                                  | 0                | 0                               |
| SWERUS-L2-32-GC2 | 1       | 35       | 37        | 36        | 33                               | 42.43                                   | 591         |         | 0                                    | 2.54                                  | 0                | 0                               |
| SWERUS-L2-32-GC2 | 1       | 38       | 40        | 39        | 36                               | 46.39                                   | 508         |         | 0                                    | 3.94                                  | 0                | 0                               |
| SWERUS-L2-32-GC2 | 1       | 40       | 42        | 41        | 38                               | 49.03                                   | 126         |         | 0                                    | 1.59                                  | 0                | 0                               |
| SWERUS-L2-32-GC2 | 1       | 43       | 45        | 44        | 41                               | 53                                      | 191         |         | 0                                    | 0                                     | 0                | 0                               |
| SWERUS-L2-32-GC2 | 1       | 47       | 49        | 48        | 45                               | 58.28                                   | 31          |         | 0                                    | 0                                     | 0                | 0                               |
| SWERUS-L2-32-GC2 | 1       | 50       | 52        | 51        | 48                               | 62.25                                   | 40          |         | 0                                    | 0                                     | 0                | 0                               |
| SWERUS-L2-32-GC2 | 1       | 53       | 55        | 54        | 51                               | 66.21                                   | 113         |         | 0                                    | 0                                     | 0                | 0                               |
| SWERUS-L2-32-GC2 | 1       | 55       | 57        | 56        | 53                               | 68.86                                   | 75          |         | 1.33                                 | 1.33                                  | 0                | 0                               |
| SWERUS-L2-32-GC2 | 1       | 58       | 60        | 59        | 56                               | 72.82                                   | 11          |         | 0                                    | 0                                     | 0                | 0                               |
| SWERUS-L2-32-GC2 | 1       | 60       | 62        | 61        | 58                               | 75.46                                   | 15          |         | 0                                    | 0                                     | 0                | 0                               |
| SWERUS-L2-32-GC2 | 1       | 63       | 65        |           |                                  |                                         |             |         |                                      |                                       |                  |                                 |

NOTE: For the GC ages, I subtracted 3 from the depth and used the muc dates that aligned with the

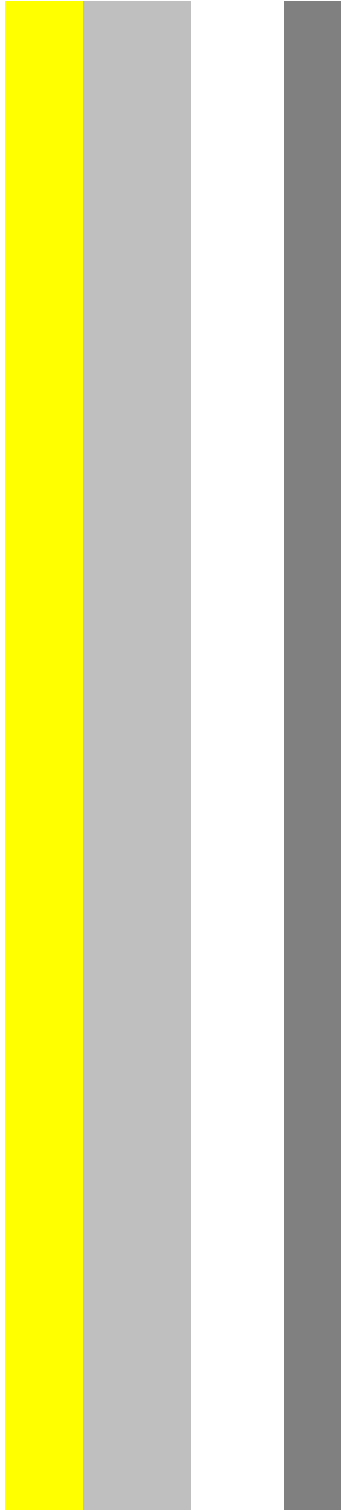

|                                         |      |      |   |      |   |   |   |   |   |   |   |   |   |      |      |   |
|-----------------------------------------|------|------|---|------|---|---|---|---|---|---|---|---|---|------|------|---|
| Bythocythere constricta Sars 1866       | 3.85 | 0    | 0 | 15.4 | 0 | 0 | 0 | 0 | 0 | 0 | 0 | 0 | 0 | 0    | 0    | 0 |
| Bythoceratina scaberrima (Brady 1887)   | 3.39 | 0    | 0 | 8.47 | 0 | 0 | 0 | 0 | 0 | 0 | 0 | 0 | 0 | 0    | 0    | 0 |
| Cluthia cluthae (Brady, Crosskey & Robe | 0    | 0    | 0 | 0    | 0 | 0 | 0 | 0 | 0 | 0 | 0 | 0 | 0 | 0    | 0    | 0 |
| Cluthia whatleyi Yasuhara, Stepanova, O | 0    | 0    | 0 | 1.22 | 0 | 0 | 0 | 0 | 0 | 0 | 0 | 0 | 0 | 1.22 | 0    | 0 |
| Cythere lutea M'Yller 1785              | 0.81 | 0.81 | 0 | 0    | 0 | 0 | 0 | 0 | 0 | 0 | 0 | 0 | 0 | 0    | 0.81 | 0 |
| Cytheretta teshekpukensis Swain 1963    | 0    | 0    | 0 | 0    | 0 | 0 | 0 | 0 | 0 | 0 | 0 | 0 | 0 | 0    | 0.27 | 0 |
| Cytheromorpha macchesneyi (Brady and    | 1.07 | 0    | 0 | 0    | 0 | 0 | 0 | 0 | 0 | 0 | 0 | 0 | 0 | 0    | 1.07 | 0 |
| Cytheropteron angulatum Brady and Rol   | 2.74 | 0.21 | 0 | 0    | 0 | 0 | 0 | 0 | 0 | 0 | 0 | 0 | 0 | 0    | 0    | 0 |
| Cytheropteron arcticum Neale and Howe   | 1.83 | 0.35 | 0 | 0.09 | 0 | 0 | 0 | 0 | 0 | 0 | 0 | 0 | 0 | 0    | 0.17 | 0 |
| Cytheropteron arcuatum Brady, Crosske   | 0.54 | 0    | 0 | 1.08 | 0 | 0 | 0 | 0 | 0 | 0 | 0 | 0 | 0 | 0    | 0    | 0 |
| Cytheropteron biconvexa Whatley and M   | 0.54 | 0    | 0 | 0.9  | 0 | 0 | 0 | 0 | 0 | 0 | 0 | 0 | 0 | 0    | 0.18 | 0 |
| Cytheropteron champlainum Cronin 198    | 0.51 | 0.17 | 0 | 1.02 | 0 | 0 | 0 | 0 | 0 | 0 | 0 | 0 | 0 | 0    | 0    | 0 |
| Cytheropteron elaei Cronin 1989         | 0.39 | 0    | 0 | 0.79 | 0 | 0 | 0 | 0 | 0 | 0 | 0 | 0 | 0 | 0    | 0.2  | 0 |
| Cytheropteron excavaolatum Whatley an   | 0    | 0    | 0 | 5.56 | 0 | 0 | 0 | 0 | 0 | 0 | 0 | 0 | 0 | 0    | 0    | 0 |
| Cytheropteron higashikawai Ishizaki 198 | 0    | 0    | 0 | 0    | 0 | 0 | 0 | 0 | 0 | 0 | 0 | 0 | 0 | 0    | 0    | 0 |
| Cytheropteron inflatum Brady, Crosskey  | 0    | 0    | 0 | 0    | 0 | 0 | 0 | 0 | 0 | 0 | 0 | 0 | 0 | 0    | 0    | 0 |

at interval



[illegible]



[illegible]









[illegible]







| % all Cytheropt | 32-MC |          |           |                                                |                         |                                          |                                              |                                                   |                                                   |                                             |                                                |                                                 |                                                 |                                                   |
|-----------------|-------|----------|-----------|------------------------------------------------|-------------------------|------------------------------------------|----------------------------------------------|---------------------------------------------------|---------------------------------------------------|---------------------------------------------|------------------------------------------------|-------------------------------------------------|-------------------------------------------------|---------------------------------------------------|
|                 |       | interval | avg depth | <i>Acetabulastoma arcticum</i> Schornikov 1970 | <i>Argilloecia</i> spp. | <i>Bythocythere constricta</i> Sars 1866 | <i>Bythoceratina scaberrima</i> (Brady 1887) | <i>Cluthia cluthae</i> (Brady, Crosskey & Roberts | <i>Cluthia whatleyi</i> Yasuhara, Stepanova, Okah | <i>Cytheretta teshekpukensis</i> Swain 1963 | <i>Cytheromorpha macchesneyi</i> (Brady and Cr | <i>Cytheropteron arcuatum</i> Brady, Crosskey & | <i>Cytheropteron higashikawai</i> Ishizaki 1981 | <i>Cytheropteron inflatum</i> Brady, Crosskey & F |
| 17.3            | 32MC4 | 0-1      | 0.5       | 6.5                                            | 0.5                     | 3                                        | 0                                            | 0                                                 | 5.3                                               | 0                                           | 0                                              | 0                                               | 1.4                                             | 0                                                 |
| 22              | 32MC4 | 1-2      | 1.5       | 11                                             | 0.4                     | 2.7                                      | 0                                            | 0                                                 | 7.8                                               | 0                                           | 0                                              | 0.2                                             | 0.4                                             | 0                                                 |
| 18.2            | 32MC4 | 2-3      | 2.5       | 8.7                                            | 1.4                     | 2.3                                      | 0                                            | 0                                                 | 13                                                | 0                                           | 0                                              | 0                                               | 1.4                                             | 0                                                 |
| 28              | 32MC4 | 3-4      | 3.5       | 8.7                                            | 1.8                     | 2.6                                      | 0                                            | 0                                                 | 14                                                | 0                                           | 0                                              | 0                                               | 2.4                                             | 0                                                 |
| 12.7            | 32MC4 | 4-5      | 4.5       | 8                                              | 4.9                     | 1.2                                      | 0                                            | 0                                                 | 9.4                                               | 0                                           | 0                                              | 0                                               | 2.1                                             | 0                                                 |
| 10.4            | 32MC4 | 5-6      | 5.5       | 7                                              | 8.4                     | 2.6                                      | 0                                            | 0                                                 | 1.8                                               | 0.1                                         | 0                                              | 0                                               | 1                                               | 0                                                 |
| 13.9            | 32MC4 | 6-7      | 6.5       | 3.3                                            | 7                       | 2.3                                      | 0                                            | 0                                                 | 6.3                                               | 0                                           | 0                                              | 0                                               | 1.7                                             | 0                                                 |
| 9.49            | 32MC4 | 7-8      | 7.5       | 4.1                                            | 4.6                     | 2.4                                      | 0                                            | 0                                                 | 11                                                | 0                                           | 0                                              | 0                                               | 1.6                                             | 0                                                 |
| 14.1            | 32MC4 | 8-9      | 8.5       | 3.3                                            | 5                       | 0.7                                      | 0                                            | 0                                                 | 7.7                                               | 0                                           | 0                                              | 0                                               | 2.3                                             | 0                                                 |
| 21.5            | 32MC4 | 9-10     | 9.5       | 2.7                                            | 2                       | 1.7                                      | 0                                            | 0                                                 | 3.3                                               | 0                                           | 0.3                                            | 0                                               | 2.7                                             | 0                                                 |
| 20.3            | 32MC4 | 10-11    | 10.5      | 1.3                                            | 3.9                     | 0                                        | 0                                            | 0                                                 | 5.2                                               | 0                                           | 0                                              | 0                                               | 2.6                                             | 0                                                 |
| 14.4            | 32MC4 | 11-12    | 11.5      | 0.5                                            | 2.5                     | 0.5                                      | 0                                            | 0                                                 | 1                                                 | 0                                           | 0.5                                            | 0                                               | 3.8                                             | 0                                                 |
| 16.7            | 32MC4 | 12-13    | 12.5      | 0.2                                            | 4.8                     | 0.9                                      | 0                                            | 0                                                 | 0                                                 | 0                                           | 0.4                                            | 0                                               | 3.7                                             | 0                                                 |
| 3.97            | 32MC4 | 13-14    | 13.5      | 0.7                                            | 2                       | 1.7                                      | 0.7                                          | 0                                                 | 0                                                 | 0                                           | 0.3                                            | 0                                               | 3.6                                             | 0                                                 |
| 11.5            | 32MC4 | 14-15    | 14.5      | 1                                              | 2.3                     | 0.7                                      | 0.3                                          | 0                                                 | 0                                                 | 0                                           | 0.3                                            | 0                                               | 1                                               | 0                                                 |
| 0               | 32MC4 | 15-16    | 15.5      | 0.3                                            | 2.6                     | 1                                        | 0.3                                          | 0                                                 | 0                                                 | 0                                           | 0                                              | 0                                               | 2.6                                             | 0                                                 |
| 7.5             | 32MC4 | 16-17    | 16.5      | 0.3                                            | 1.3                     | 3.7                                      | 0                                            | 0                                                 | 0                                                 | 0                                           | 0                                              | 0                                               | 0.7                                             | 0                                                 |
| 23              | 32MC4 | 17-18    | 17.5      | 1.4                                            | 0.5                     | 3.8                                      | 0                                            | 0                                                 | 0.2                                               | 0                                           | 0                                              | 0                                               | 1.4                                             | 0                                                 |
| 30.7            | 32MC4 | 18-19    | 18.5      | 1.7                                            | 0.3                     | 1.7                                      | 0                                            | 0                                                 | 0                                                 | 0                                           | 0                                              | 0                                               | 0.7                                             | 0                                                 |
| 45.5            | 32MC4 | 19-20    | 19.5      | 5.2                                            | 0                       | 2.6                                      | 0.7                                          | 0                                                 | 0                                                 | 0                                           | 0.3                                            | 0                                               | 1.3                                             | 0                                                 |
| 20              | 32MC4 | 20-21    | 20.5      | 3.3                                            | 0.3                     | 2.9                                      | 0                                            | 0                                                 | 0                                                 | 0                                           | 0                                              | 0                                               | 2.3                                             | 0                                                 |
|                 | 32MC4 | 21-22    | 21.5      | 1.5                                            | 0.3                     | 3.9                                      | 0.3                                          | 0                                                 | 0                                                 | 0                                           | 0                                              | 0                                               | 0.6                                             | 0                                                 |
|                 | 32MC4 | 22-23    | 22.5      | 1.6                                            | 0.2                     | 4                                        | 0.2                                          | 0                                                 | 0                                                 | 0                                           | 0                                              | 0                                               | 0                                               | 0                                                 |
|                 | 32MC4 | 23-24    | 23.5      | 0.6                                            | 0                       | 6.1                                      | 0.9                                          | 0                                                 | 0.3                                               | 0                                           | 0                                              | 0                                               | 0.6                                             | 0                                                 |
|                 | 32MC4 | 26-27    | 26.5      | 2.3                                            | 0                       | 2.7                                      | 0                                            | 0                                                 | 0                                                 | 0                                           | 0                                              | 0                                               | 0                                               | 0                                                 |
|                 | 32MC4 | 27-28    | 27.5      | 1.8                                            | 0                       | 1.4                                      | 0.2                                          | 0                                                 | 0                                                 | 0                                           | 0                                              | 0                                               | 0.4                                             | 0                                                 |
|                 | 32MC4 | 28-29    | 28.5      | 4.6                                            | 0                       | 2.2                                      | 0.4                                          | 0                                                 | 0                                                 | 0                                           | 0                                              | 0                                               | 0                                               | 0                                                 |

|       |       |      |     |     |     |     |   |     |   |   |   |   |   |
|-------|-------|------|-----|-----|-----|-----|---|-----|---|---|---|---|---|
| 32MC4 | 29-30 | 29.5 | 7.6 | 0.3 | 0   | 0.3 | 0 | 0   | 0 | 0 | 0 | 0 | 0 |
| 32MC4 | 30-31 | 30.5 | 5.3 | 0   | 0.8 | 0.2 | 0 | 0.2 | 0 | 0 | 0 | 0 | 0 |
| 32MC4 | 31-32 | 31.5 | 4.9 | 0   | 1.3 | 0   | 0 | 0.7 | 0 | 0 | 0 | 0 | 0 |



|                                                    |     |     |   |     |    |     |   |   |   |     |     |     |     |     |     |     |  |
|----------------------------------------------------|-----|-----|---|-----|----|-----|---|---|---|-----|-----|-----|-----|-----|-----|-----|--|
| <i>Cytheropteron parahamatum</i> Yasuhara, Ste     |     |     |   |     |    |     |   |   |   |     |     |     |     |     |     |     |  |
| <i>Cytheropteron scoresbyi</i> Whatley and Eyno    |     |     |   |     |    |     |   |   |   |     |     |     |     |     |     |     |  |
| <i>Cytheropteron sedovi</i> Schneider 1969         |     |     |   |     |    |     |   |   |   |     |     |     |     |     |     |     |  |
| <i>Cytheropteron suzdalskyi</i> Lev 1972           |     |     |   |     |    |     |   |   |   |     |     |     |     |     |     |     |  |
| <i>Cytheropteron</i> spp.                          |     |     |   |     |    |     |   |   |   |     |     |     |     |     |     |     |  |
| Cytheropteron TOTAL                                |     |     |   |     |    |     |   |   |   |     |     |     |     |     |     |     |  |
| <i>Eucythere</i> sp.                               |     |     |   |     |    |     |   |   |   |     |     |     |     |     |     |     |  |
| <i>Eucytherurua delineata</i> Whatley and Eynon    |     |     |   |     |    |     |   |   |   |     |     |     |     |     |     |     |  |
| <i>Heterocyprideis fascis</i> (Brady and Norman 1  |     |     |   |     |    |     |   |   |   |     |     |     |     |     |     |     |  |
| <i>Heterocyprideis sorbyana</i> (Jones 1857)       |     |     |   |     |    |     |   |   |   |     |     |     |     |     |     |     |  |
| <i>Krithe hunti</i> Yasuhara, Stepanova, Okahash   |     |     |   |     |    |     |   |   |   |     |     |     |     |     |     |     |  |
| <i>Krithe minima</i> Coles, Whatley, & Moguilevsk  |     |     |   |     |    |     |   |   |   |     |     |     |     |     |     |     |  |
| <i>Microcythere medistriata</i> (Joy and Clark 197 |     |     |   |     |    |     |   |   |   |     |     |     |     |     |     |     |  |
| <i>Paracytherois</i> spp.                          |     |     |   |     |    |     |   |   |   |     |     |     |     |     |     |     |  |
| <i>Pedicythere</i> spp.                            |     |     |   |     |    |     |   |   |   |     |     |     |     |     |     |     |  |
| <i>Polycopse</i> spp.                              |     |     |   |     |    |     |   |   |   |     |     |     |     |     |     |     |  |
| <i>Propontocypris</i> sp.                          |     |     |   |     |    |     |   |   |   |     |     |     |     |     |     |     |  |
| 1.3                                                | 9.4 | 0.3 | 0 | 0.1 | 13 | 0   | 0 | 0 | 0 | 1.4 | 0   | 0.7 | 0.9 | 0.3 | 58  | 1.4 |  |
| 1.1                                                | 10  | 0   | 0 | 0   | 12 | 0   | 0 | 0 | 0 | 2.1 | 0   | 0.8 | 3.6 | 0   | 50  | 0.6 |  |
| 2.6                                                | 18  | 0   | 0 | 0   | 21 | 0   | 0 | 0 | 0 | 2.1 | 0   | 0.2 | 6.8 | 1   | 29  | 1.7 |  |
| 4.7                                                | 14  | 0   | 0 | 0   | 21 | 0   | 0 | 0 | 0 | 1   | 0   | 0.8 | 8.1 | 0.4 | 24  | 0.4 |  |
| 6.8                                                | 25  | 0   | 0 | 0   | 33 | 0.2 | 0 | 0 | 0 | 2.4 | 0   | 0   | 5.2 | 0.2 | 14  | 1.4 |  |
| 7.8                                                | 17  | 0   | 0 | 0   | 26 | 0   | 0 | 0 | 0 | 3.1 | 0   | 0.1 | 7.3 | 0.9 | 18  | 0.1 |  |
| 6.6                                                | 12  | 0.3 | 0 | 0   | 20 | 0   | 0 | 0 | 0 | 7.6 | 0   | 0   | 6.6 | 1   | 9.9 | 0   |  |
| 8.9                                                | 13  | 0.3 | 0 | 0   | 24 | 0   | 0 | 0 | 0 | 6.8 | 0.8 | 0.3 | 6.8 | 0.5 | 9.2 | 0   |  |
| 8                                                  | 9.3 | 0   | 0 | 0   | 20 | 0   | 0 | 0 | 0 | 7.3 | 2   | 0   | 2   | 0   | 8.7 | 0   |  |
| 15                                                 | 13  | 0   | 0 | 0   | 30 | 0   | 0 | 0 | 0 | 9   | 0   | 0   | 2.7 | 0.3 | 13  | 0.3 |  |
| 24                                                 | 8.5 | 0   | 0 | 0   | 36 | 0   | 0 | 0 | 0 | 5.9 | 0   | 0.3 | 6.2 | 0.7 | 21  | 1.6 |  |
| 17                                                 | 14  | 0.5 | 0 | 0   | 36 | 0   | 0 | 0 | 0 | 1   | 0   | 1.8 | 1.8 | 2   | 46  | 1   |  |
| 12                                                 | 13  | 1.1 | 0 | 0   | 30 | 0   | 0 | 0 | 0 | 0   | 0   | 2.2 | 3.5 | 2.2 | 48  | 0.9 |  |
| 11                                                 | 10  | 3   | 0 | 0   | 28 | 0   | 0 | 0 | 0 | 0.3 | 0   | 5   | 0.7 | 2   | 49  | 1   |  |
| 5                                                  | 8.9 | 2.3 | 0 | 0   | 17 | 0   | 0 | 0 | 0 | 0.3 | 0   | 1.3 | 3.3 | 2.6 | 57  | 0.7 |  |
| 3.1                                                | 7.2 | 4.9 | 0 | 0   | 18 | 0   | 0 | 0 | 0 | 0.5 | 0   | 2.8 | 2.1 | 2.3 | 56  | 0.5 |  |
| 3.3                                                | 6.3 | 13  | 0 | 0   | 24 | 0   | 0 | 0 | 0 | 1   | 0   | 4   | 2.7 | 0.7 | 58  | 0.3 |  |
| 1.6                                                | 6.4 | 16  | 0 | 0.2 | 26 | 0   | 0 | 0 | 0 | 0.3 | 0   | 2.4 | 0.8 | 0   | 56  | 0   |  |
| 1                                                  | 9.6 | 17  | 0 | 0.3 | 29 | 0   | 0 | 0 | 0 | 0.3 | 0   | 5.3 | 1   | 0.3 | 59  | 0.3 |  |
| 0                                                  | 6.2 | 12  | 0 | 0   | 19 | 0   | 0 | 0 | 0 | 0.3 | 0   | 2.6 | 0   | 1.6 | 65  | 0   |  |
| 2.3                                                | 17  | 12  | 0 | 0   | 34 | 0   | 0 | 0 | 0 | 0.3 | 0   | 5.6 | 0.7 | 2.3 | 47  | 0   |  |
| 1.8                                                | 9.8 | 11  | 0 | 0   | 23 | 0   | 0 | 0 | 0 | 0.6 | 0   | 5.4 | 2.4 | 1.2 | 58  | 0   |  |
| 0.4                                                | 11  | 13  | 0 | 0   | 25 | 0   | 0 | 0 | 0 | 0.4 | 0   | 6.9 | 0.2 | 2.7 | 57  | 0   |  |
| 0                                                  | 8.1 | 11  | 0 | 0   | 20 | 0   | 0 | 0 | 0 | 0.6 | 0   | 3.8 | 0   | 4   | 52  | 0   |  |
| 0                                                  | 9.3 | 16  | 0 | 0.3 | 25 | 0   | 0 | 0 | 0 | 1.7 | 0   | 4.7 | 0.3 | 0.7 | 57  | 0.3 |  |
| 0                                                  | 7.6 | 11  | 0 | 0   | 19 | 0.2 | 0 | 0 | 0 | 2.8 | 0   | 5.4 | 0.2 | 1.6 | 64  | 0.8 |  |
| 0                                                  | 5.2 | 11  | 0 | 0   | 16 | 0   | 0 | 0 | 0 | 4.2 | 0   | 4.8 | 0   | 0.4 | 61  | 0.4 |  |

|     |     |    |     |   |    |     |   |   |   |     |   |     |     |     |    |     |
|-----|-----|----|-----|---|----|-----|---|---|---|-----|---|-----|-----|-----|----|-----|
| 0.7 | 9.3 | 19 | 0   | 0 | 29 | 0.3 | 0 | 0 | 0 | 6.6 | 0 | 7.9 | 0   | 0.3 | 39 | 0.3 |
| 0   | 2.1 | 9  | 0.2 | 0 | 11 | 0   | 0 | 0 | 0 | 7.6 | 0 | 6.9 | 1   | 0.5 | 56 | 0.2 |
| 0   | 2.6 | 13 | 0   | 0 | 16 | 0.3 | 0 | 0 | 0 | 7.8 | 0 | 6.2 | 1.3 | 0.3 | 44 | 0.3 |

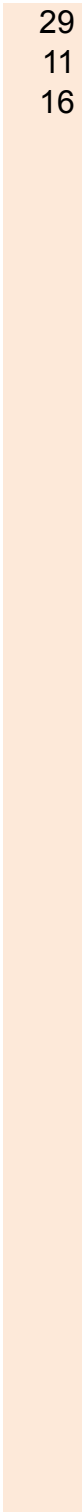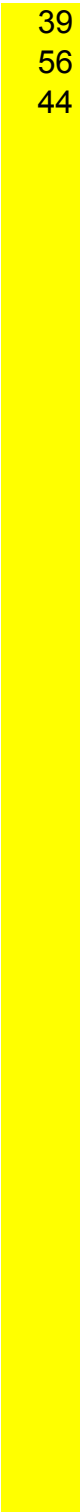

| <i>Pseudocythere caudata</i> Sars 1866          |     |     |   |     |     |     |   |     |
|-------------------------------------------------|-----|-----|---|-----|-----|-----|---|-----|
| <i>Rabilimis mirabilis</i> (Brady 1868)         |     |     |   |     |     |     |   |     |
| <i>Sarsicytheridea bradlii</i> (Norman 1865)    |     |     |   |     |     |     |   |     |
| <i>Sclerochilus</i> spp.                        |     |     |   |     |     |     |   |     |
| <i>Semicytherura complanata</i> (Brady, Crosske |     |     |   |     |     |     |   |     |
| <i>Semicytherura</i> spp.                       |     |     |   |     |     |     |   |     |
| Other                                           |     |     |   |     |     |     |   |     |
| Indeterminate/IRO                               |     |     |   |     |     |     |   |     |
| Total                                           |     |     |   |     |     |     |   |     |
| 1.5                                             | 6.8 | 0   | 0 | 0   | 0   | 0.7 | 0 | 100 |
| 0.6                                             | 7.8 | 0   | 0 | 0   | 0   | 0.2 | 0 | 100 |
| 1.6                                             | 9   | 0   | 0 | 0   | 0   | 1.2 | 0 | 100 |
| 1                                               | 15  | 0   | 0 | 0   | 0   | 0.4 | 0 | 100 |
| 1.9                                             | 17  | 0   | 0 | 0   | 0   | 0.9 | 0 | 100 |
| 0.9                                             | 23  | 0.1 | 0 | 0   | 0   | 0.4 | 0 | 100 |
| 1.3                                             | 34  | 0   | 0 | 0   | 0   | 0   | 0 | 100 |
| 1.1                                             | 28  | 0   | 0 | 0   | 0   | 0   | 0 | 100 |
| 1.3                                             | 41  | 0   | 0 | 0   | 0   | 1.7 | 0 | 100 |
| 1.3                                             | 33  | 0   | 0 | 0   | 0   | 0.3 | 0 | 100 |
| 1.6                                             | 16  | 0   | 0 | 0   | 0   | 1.3 | 0 | 100 |
| 2                                               | 3   | 0   | 0 | 0   | 0   | 0.5 | 0 | 100 |
| 4.6                                             | 2.2 | 0   | 0 | 0   | 0   | 0   | 0 | 100 |
| 9.6                                             | 0   | 0   | 0 | 0   | 0   | 0   | 0 | 100 |
| 12                                              | 0   | 0.3 | 0 | 0   | 0   | 0   | 0 | 100 |
| 14                                              | 0   | 0   | 0 | 0   | 0   | 0   | 0 | 100 |
| 4.3                                             | 0.3 | 0   | 0 | 0   | 0   | 0   | 0 | 100 |
| 8.8                                             | 0   | 0   | 0 | 0   | 0   | 0   | 0 | 100 |
| 1                                               | 0.3 | 0   | 0 | 0   | 0   | 0   | 0 | 100 |
| 1.6                                             | 0   | 0   | 0 | 0   | 0   | 0.3 | 0 | 100 |
| 2.9                                             | 0   | 0   | 0 | 0   | 0   | 0.7 | 0 | 100 |
| 3                                               | 0   | 0   | 0 | 0   | 0   | 0   | 0 | 100 |
| 0                                               | 0   | 0   | 0 | 0   | 0   | 1.6 | 0 | 100 |
| 10                                              | 0.9 | 0   | 0 | 0   | 0   | 0.6 | 0 | 100 |
| 3.7                                             | 1   | 0   | 0 | 0   | 0   | 0   | 0 | 100 |
| 0.8                                             | 1.6 | 0   | 0 | 0   | 0   | 0   | 0 | 100 |
| 2                                               | 3.8 | 0   | 0 | 0.2 | 0.4 | 0   | 0 | 100 |

%Abund vs CORE DEPTH

All Cytheropteron species corr

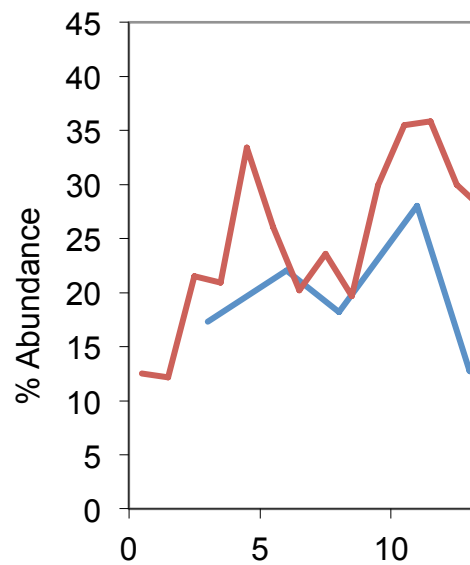

Rabilimis

60

|     |     |   |   |   |   |     |   |     |
|-----|-----|---|---|---|---|-----|---|-----|
| 2   | 6.3 | 0 | 0 | 0 | 0 | 0   | 0 | 100 |
| 1.2 | 8.6 | 0 | 0 | 0 | 0 | 0.1 | 0 | 100 |
| 0.7 | 17  | 0 | 0 | 0 | 0 | 0   | 0 | 100 |

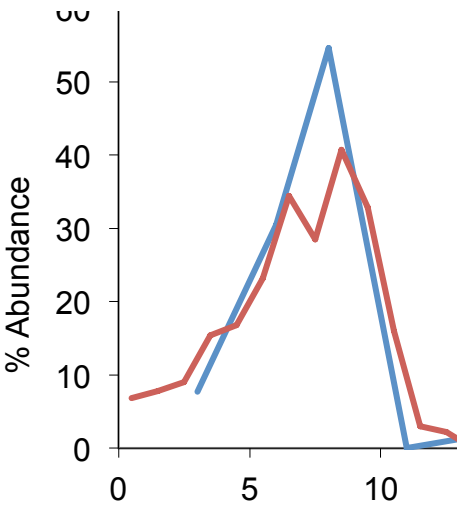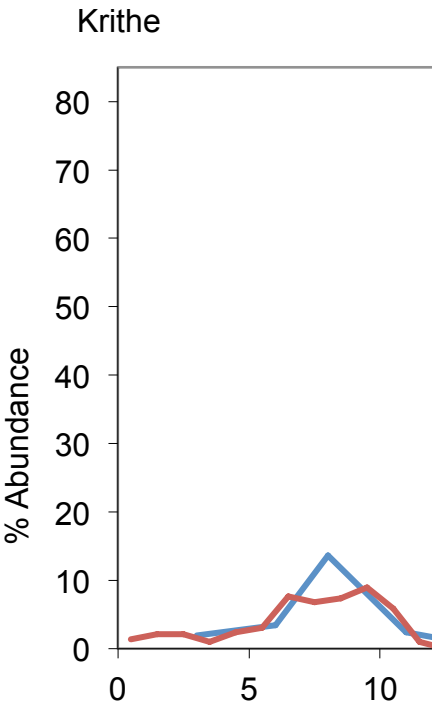

ibined

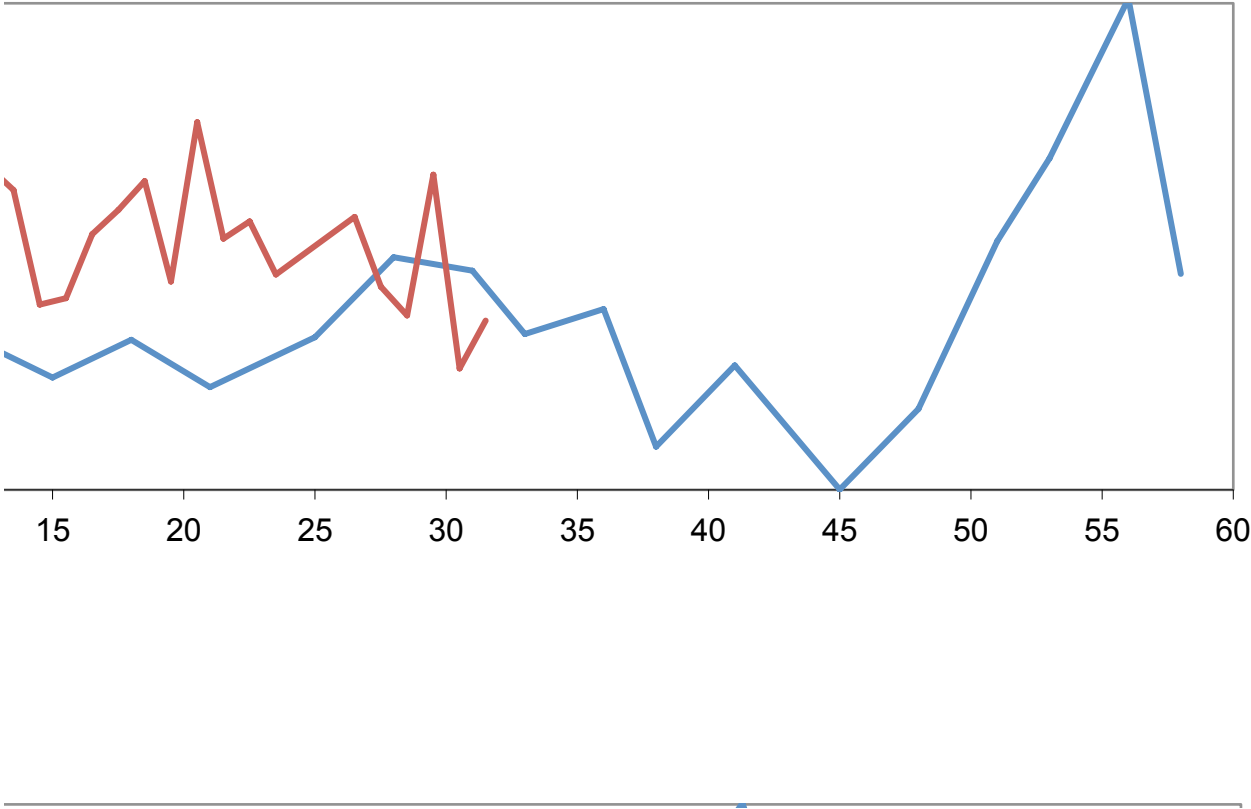

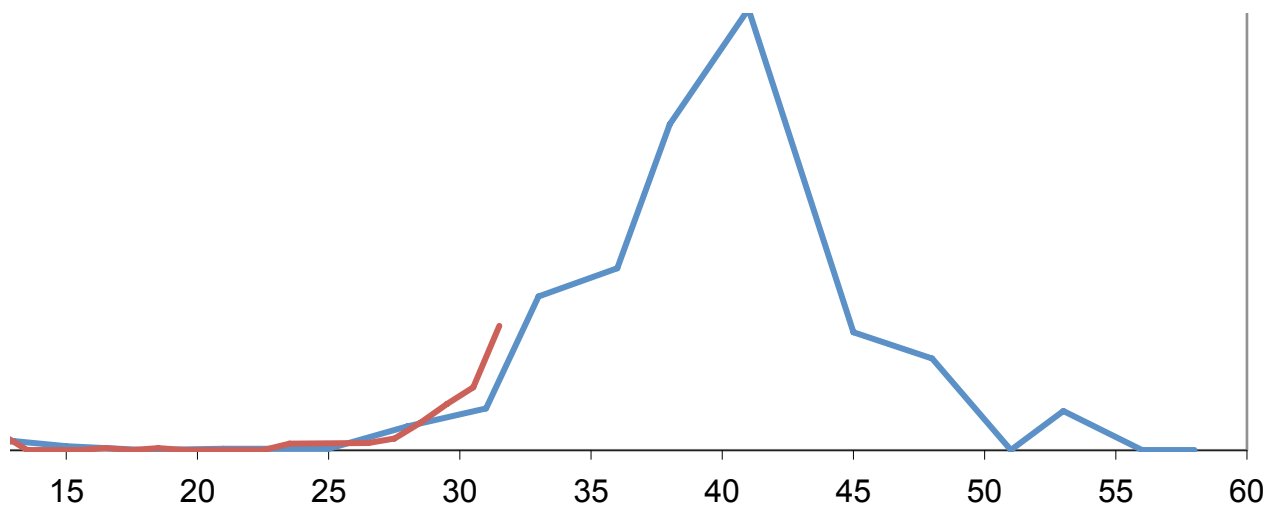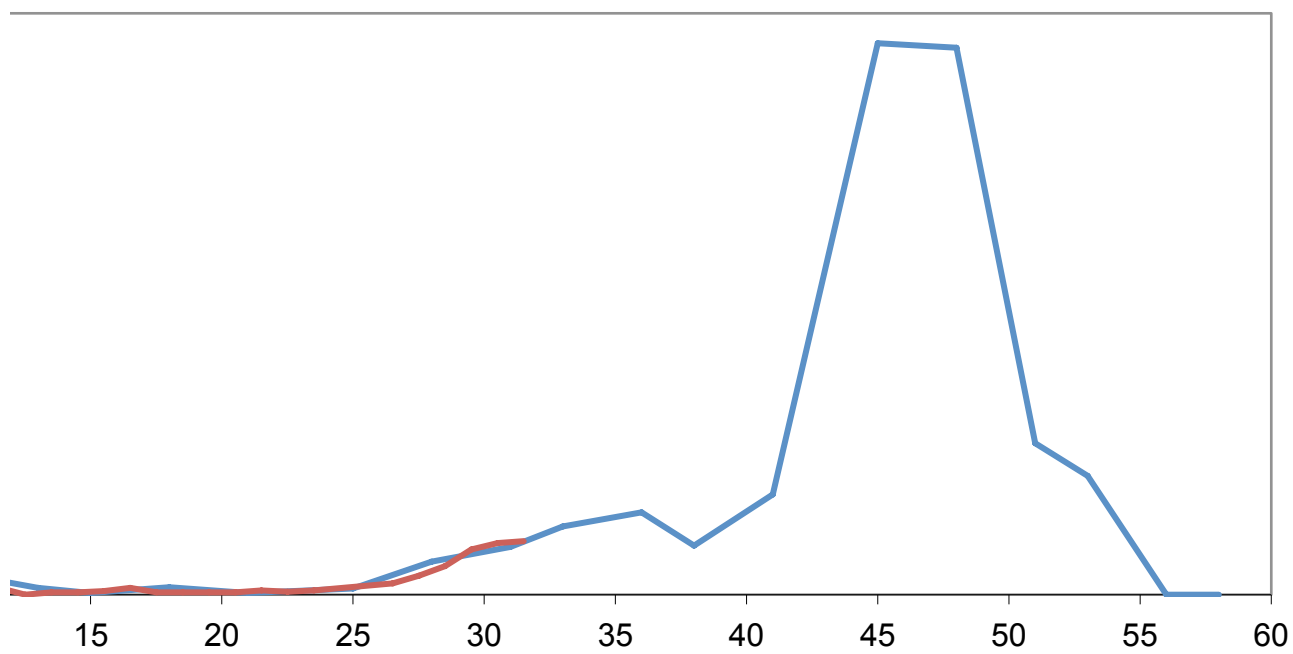

Acetab

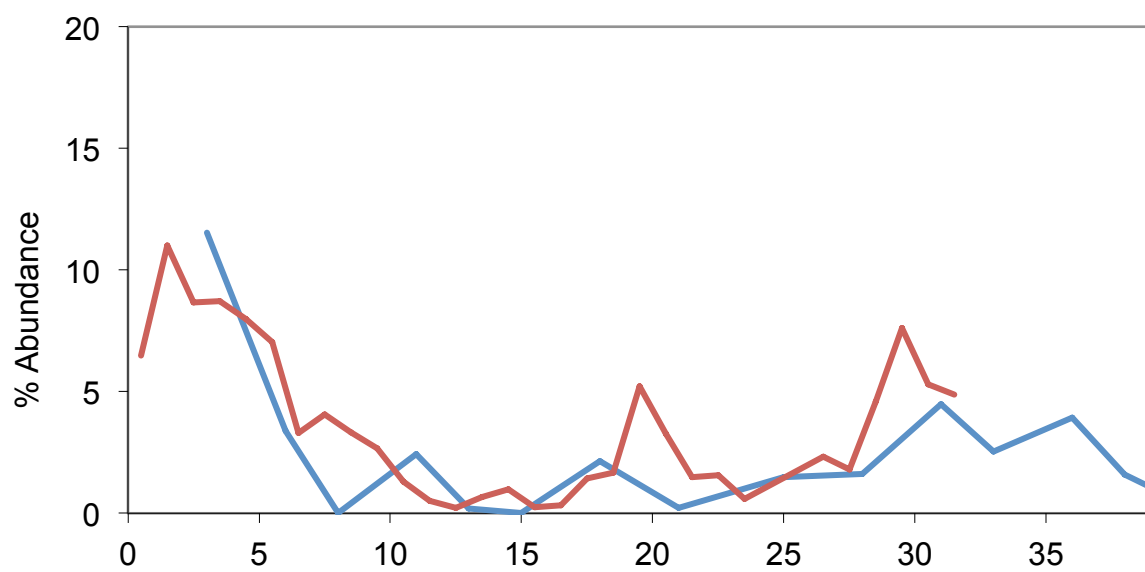

Polycop

80

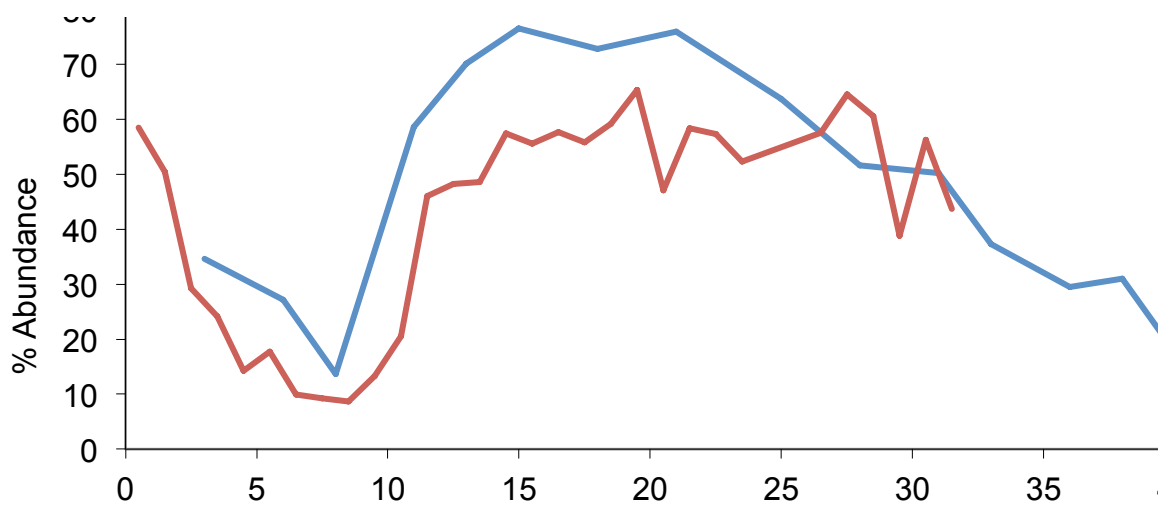

Pseudocythere

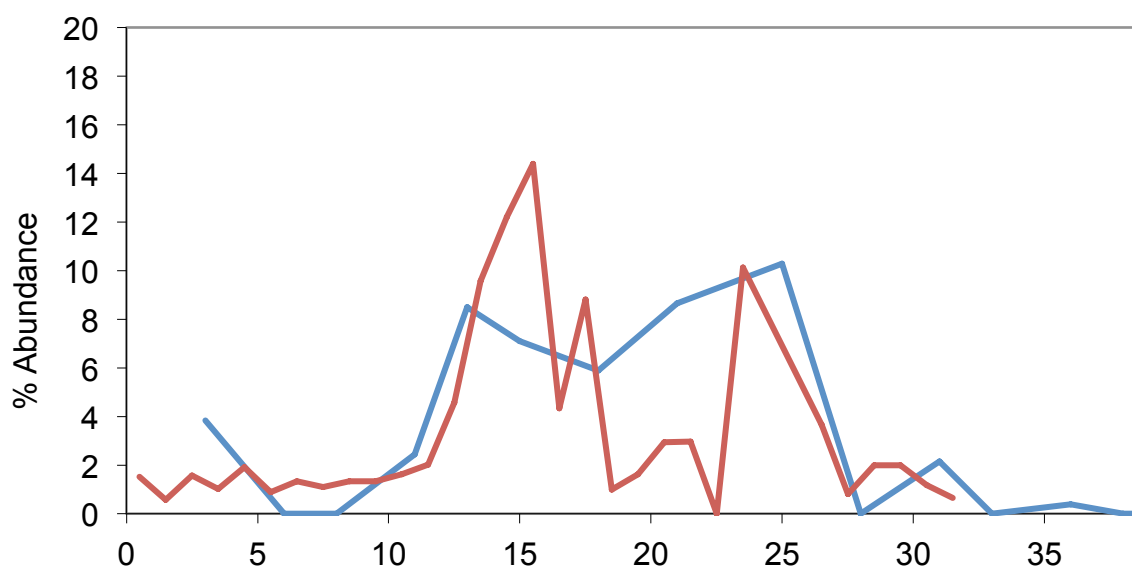



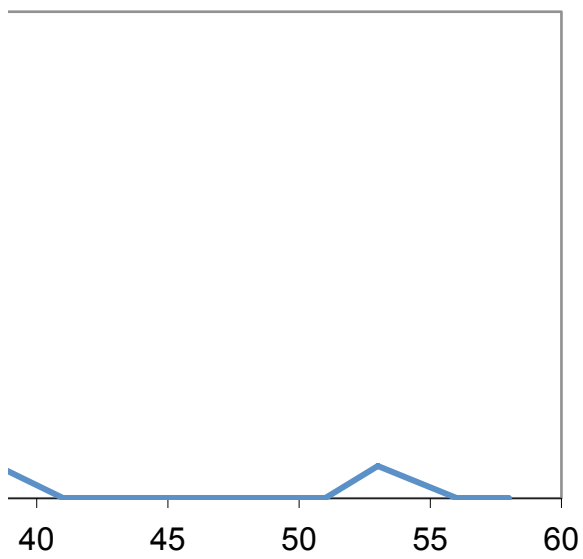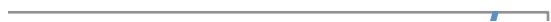

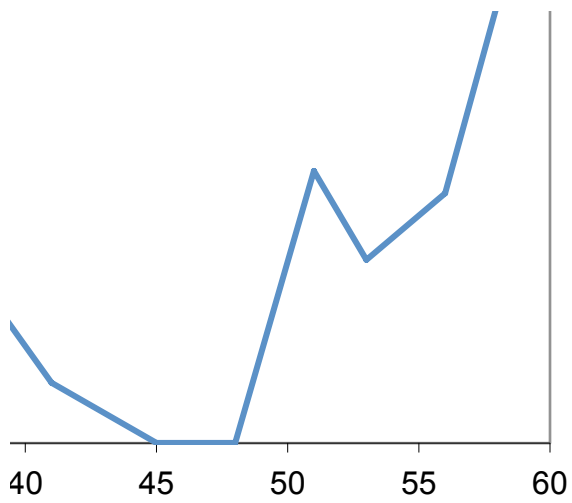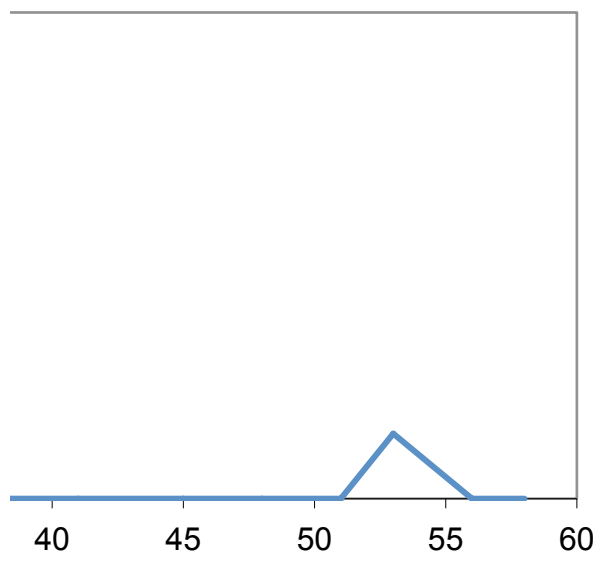

Supplement: Supplementary file 3 [file Gemery-SuppTables-32GC2-32MC S3-v32GC &32MUC %abundance.pdf › Gemery-SuppTables-32GC2-32MC S3-v32GC &32MUC %abundance.pdf]
