# Supplementary material for: Central Arctic Ocean paleoceanography from ~ 50 ka to present, on the basis of ostracode faunal assemblages from SWERUS 2014 expedition
Source: Copernicus journal article supplement (doi:10.5194/cp-2017-22), 2017-03-28
Supplement: Supplementary file 1 [file Gemery-SuppTables-32GC2-32MC S1-32-MUC4 counts.pdf › Gemery-SuppTables-32GC2-32MC S1-32-MUC4 counts.pdf]

| 32-MC4 |       | cm (top to bottom) | <i>Acanthocythereis dunelmensis</i> (Norman 1869) se | <i>Acetabulastoma arcticum</i> Schornikov 1970 | <i>Argilloecia</i> spp. | <i>Baffinicythere howei</i> Hazel 1967 | <i>Bythocythere constricta</i> Sars 1866 | <i>Bythoceratina scaberrima</i> (Brady 1887) | <i>Cluthia cluthae</i> (Brady, Crosskey & Robertson 18 | <i>Cluthia whatleyi</i> Yasuhara, Stepanova, Okahashi, | <i>Cythere lutea</i> Müller 1785 | <i>Cytheretta teshekpukensis</i> Swain 1963 | <i>Cytheromorpha macchesneyi</i> (Brady and Crossk | <i>Cytheropteron angulatum</i> Brady and Robertson 1 | <i>Cytheropteron arcticum</i> Neale and Howe 1973 |
|--------|-------|--------------------|------------------------------------------------------|------------------------------------------------|-------------------------|----------------------------------------|------------------------------------------|----------------------------------------------|--------------------------------------------------------|--------------------------------------------------------|----------------------------------|---------------------------------------------|----------------------------------------------------|------------------------------------------------------|---------------------------------------------------|
| 32-MC4 | 0-1   |                    | 56                                                   | 4                                              |                         | 26                                     | 0                                        |                                              | 46                                                     |                                                        |                                  |                                             |                                                    |                                                      |                                                   |
| 32-MC4 | 1-2   |                    | 58                                                   | 2                                              |                         | 14                                     | 0                                        |                                              | 41                                                     |                                                        |                                  |                                             |                                                    |                                                      |                                                   |
| 32-MC4 | 2-3   |                    | 50                                                   | 8                                              |                         | 13                                     | 0                                        |                                              | 77                                                     |                                                        |                                  |                                             |                                                    |                                                      |                                                   |
| 32-MC4 | 3-4   |                    | 43                                                   | 9                                              |                         | 13                                     | 0                                        |                                              | 70                                                     |                                                        |                                  |                                             |                                                    |                                                      |                                                   |
| 32-MC4 | 4-5   |                    | 46                                                   | 28                                             |                         | 7                                      | 0                                        |                                              | 54                                                     |                                                        |                                  |                                             |                                                    |                                                      |                                                   |
| 32-MC4 | 5-6   |                    | 48                                                   | 57                                             |                         | 18                                     | 0                                        |                                              | 12                                                     |                                                        | 1                                |                                             |                                                    |                                                      |                                                   |
| 32-MC4 | 6-7   |                    | 10                                                   | 21                                             |                         | 7                                      | 0                                        |                                              | 19                                                     |                                                        |                                  |                                             |                                                    |                                                      |                                                   |
| 32-MC4 | 7-8   |                    | 15                                                   | 17                                             |                         | 9                                      | 0                                        |                                              | 42                                                     |                                                        |                                  |                                             |                                                    |                                                      |                                                   |
| 32-MC4 | 8-9   |                    | 10                                                   | 15                                             |                         | 2                                      | 0                                        |                                              | 23                                                     |                                                        |                                  |                                             |                                                    |                                                      |                                                   |
| 32-MC4 | 9-10  |                    | 8                                                    | 6                                              |                         | 5                                      | 0                                        |                                              | 10                                                     |                                                        |                                  |                                             | 1                                                  |                                                      |                                                   |
| 32-MC4 | 10-11 |                    | 4                                                    | 12                                             |                         | 0                                      | 0                                        |                                              | 16                                                     |                                                        |                                  |                                             |                                                    |                                                      |                                                   |
| 32-MC4 | 11-12 |                    | 2                                                    | 10                                             |                         | 2                                      | 0                                        |                                              | 4                                                      |                                                        |                                  |                                             | 2                                                  |                                                      |                                                   |
| 32-MC4 | 12-13 |                    | 1                                                    | 22                                             |                         | 4                                      | 0                                        |                                              | 0                                                      |                                                        |                                  |                                             | 2                                                  |                                                      |                                                   |
| 32-MC4 | 13-14 |                    | 2                                                    | 6                                              |                         | 5                                      | 2                                        |                                              | 0                                                      |                                                        |                                  |                                             | 1                                                  |                                                      |                                                   |
| 32-MC4 | 14-15 |                    | 3                                                    | 7                                              |                         | 2                                      | 1                                        |                                              | 0                                                      |                                                        |                                  |                                             | 1                                                  |                                                      |                                                   |
| 32-MC4 | 15-16 |                    | 1                                                    | 10                                             |                         | 4                                      | 1                                        |                                              | 0                                                      |                                                        |                                  |                                             |                                                    |                                                      |                                                   |
| 32-MC4 | 16-17 |                    | 1                                                    | 4                                              |                         | 11                                     | 0                                        |                                              | 0                                                      |                                                        |                                  |                                             |                                                    |                                                      |                                                   |
| 32-MC4 | 17-18 |                    | 9                                                    | 3                                              |                         | 24                                     | 0                                        |                                              | 1                                                      |                                                        |                                  |                                             |                                                    |                                                      |                                                   |

|        |       |  |    |   |  |    |   |  |   |  |  |   |  |  |
|--------|-------|--|----|---|--|----|---|--|---|--|--|---|--|--|
| 32-MC4 | 18-19 |  | 5  | 1 |  | 5  | 0 |  | 0 |  |  |   |  |  |
| 32-MC4 | 19-20 |  | 16 | 0 |  | 8  | 2 |  | 0 |  |  | 1 |  |  |
| 32-MC4 | 20-21 |  | 10 | 1 |  | 9  | 0 |  | 0 |  |  |   |  |  |
| 32-MC4 | 21-22 |  | 5  | 1 |  | 13 | 1 |  | 0 |  |  |   |  |  |
| 32-MC4 | 22-23 |  | 7  | 1 |  | 18 | 1 |  | 0 |  |  |   |  |  |
| 32-MC4 | 23-24 |  | 2  | 0 |  | 21 | 3 |  | 1 |  |  |   |  |  |
| 32-MC4 | 24-25 |  | 27 | 0 |  | 19 | 6 |  | 0 |  |  |   |  |  |
| 32-MC4 | 25-26 |  | 14 | 0 |  | 20 | 0 |  | 0 |  |  |   |  |  |
| 32-MC4 | 26-27 |  | 7  | 0 |  | 8  | 0 |  | 0 |  |  |   |  |  |
| 32-MC4 | 27-28 |  | 9  | 0 |  | 7  | 1 |  | 0 |  |  |   |  |  |
| 32-MC4 | 28-29 |  | 23 | 0 |  | 11 | 2 |  | 0 |  |  |   |  |  |
| 32-MC4 | 29-30 |  | 23 | 1 |  | 0  | 1 |  | 0 |  |  |   |  |  |
| 32-MC4 | 30-31 |  | 68 | 0 |  | 10 | 3 |  | 3 |  |  |   |  |  |
| 32-MC4 | 31-32 |  | 15 | 0 |  | 4  | 0 |  | 2 |  |  |   |  |  |



|  |  |  |  |  |   |   |  |  |  |  |  |   |  |  |  |  |  |
|--|--|--|--|--|---|---|--|--|--|--|--|---|--|--|--|--|--|
|  |  |  |  |  | 2 |   |  |  |  |  |  | 3 |  |  |  |  |  |
|  |  |  |  |  | 4 |   |  |  |  |  |  | 0 |  |  |  |  |  |
|  |  |  |  |  | 7 |   |  |  |  |  |  | 7 |  |  |  |  |  |
|  |  |  |  |  | 2 |   |  |  |  |  |  | 6 |  |  |  |  |  |
|  |  |  |  |  | 0 |   |  |  |  |  |  | 2 |  |  |  |  |  |
|  |  |  |  |  | 2 |   |  |  |  |  |  | 0 |  |  |  |  |  |
|  |  |  |  |  | 3 | 1 |  |  |  |  |  | 3 |  |  |  |  |  |
|  |  |  |  |  | 0 |   |  |  |  |  |  | 2 |  |  |  |  |  |
|  |  |  |  |  | 0 |   |  |  |  |  |  | 0 |  |  |  |  |  |
|  |  |  |  |  | 2 |   |  |  |  |  |  |   |  |  |  |  |  |
|  |  |  |  |  | 0 |   |  |  |  |  |  | 0 |  |  |  |  |  |
|  |  |  |  |  | 0 |   |  |  |  |  |  | 2 |  |  |  |  |  |
|  |  |  |  |  | 0 |   |  |  |  |  |  | 0 |  |  |  |  |  |
|  |  |  |  |  | 0 |   |  |  |  |  |  | 0 |  |  |  |  |  |



|  |  |    |     |  |  |   |   |  |  |  |  |   |  |  |  |  |  |
|--|--|----|-----|--|--|---|---|--|--|--|--|---|--|--|--|--|--|
|  |  | 29 | 51  |  |  |   | 1 |  |  |  |  |   |  |  |  |  |  |
|  |  | 19 | 36  |  |  |   |   |  |  |  |  |   |  |  |  |  |  |
|  |  | 53 | 37  |  |  |   |   |  |  |  |  |   |  |  |  |  |  |
|  |  | 33 | 37  |  |  |   |   |  |  |  |  |   |  |  |  |  |  |
|  |  | 51 | 58  |  |  |   |   |  |  |  |  |   |  |  |  |  |  |
|  |  | 28 | 39  |  |  |   |   |  |  |  |  |   |  |  |  |  |  |
|  |  | 85 | 82  |  |  |   | 1 |  |  |  |  |   |  |  |  |  |  |
|  |  | 53 | 46  |  |  |   | 2 |  |  |  |  |   |  |  |  |  |  |
|  |  | 28 | 47  |  |  |   | 1 |  |  |  |  |   |  |  |  |  |  |
|  |  | 38 | 54  |  |  |   |   |  |  |  |  | 1 |  |  |  |  |  |
|  |  | 26 | 55  |  |  |   |   |  |  |  |  |   |  |  |  |  |  |
|  |  | 28 | 58  |  |  |   |   |  |  |  |  | 1 |  |  |  |  |  |
|  |  | 27 | 115 |  |  | 2 |   |  |  |  |  |   |  |  |  |  |  |
|  |  | 8  | 40  |  |  |   |   |  |  |  |  | 1 |  |  |  |  |  |



|  |  |  |  |  |   |  |  |  |    |   |  |    |  |  |  |  |  |
|--|--|--|--|--|---|--|--|--|----|---|--|----|--|--|--|--|--|
|  |  |  |  |  |   |  |  |  | 1  |   |  | 16 |  |  |  |  |  |
|  |  |  |  |  |   |  |  |  | 1  |   |  | 8  |  |  |  |  |  |
|  |  |  |  |  |   |  |  |  | 1  |   |  | 17 |  |  |  |  |  |
|  |  |  |  |  |   |  |  |  | 2  |   |  | 18 |  |  |  |  |  |
|  |  |  |  |  |   |  |  |  | 2  |   |  | 31 |  |  |  |  |  |
|  |  |  |  |  |   |  |  |  | 2  |   |  | 13 |  |  |  |  |  |
|  |  |  |  |  |   |  |  |  | 3  |   |  | 44 |  |  |  |  |  |
|  |  |  |  |  | 1 |  |  |  | 5  |   |  | 15 |  |  |  |  |  |
|  |  |  |  |  |   |  |  |  | 5  |   |  | 14 |  |  |  |  |  |
|  |  |  |  |  |   |  |  |  | 14 |   |  | 27 |  |  |  |  |  |
|  |  |  |  |  |   |  |  |  | 21 |   |  | 24 |  |  |  |  |  |
|  |  |  |  |  |   |  |  |  | 20 |   |  | 24 |  |  |  |  |  |
|  |  |  |  |  |   |  |  |  | 97 |   |  | 89 |  |  |  |  |  |
|  |  |  |  |  |   |  |  |  | 24 | 0 |  | 19 |  |  |  |  |  |



|                                                       |    |  |  |  |    |     |  |    |    |  |  |     |  |  |  |  |   |  |  |
|-------------------------------------------------------|----|--|--|--|----|-----|--|----|----|--|--|-----|--|--|--|--|---|--|--|
| <i>Paracyprideis pseudopunctillata</i> Swain 1963     |    |  |  |  |    |     |  |    |    |  |  |     |  |  |  |  |   |  |  |
| <i>Paracytheroïs</i> spp.                             | 8  |  |  |  | 3  | 505 |  | 12 | 13 |  |  | 59  |  |  |  |  |   |  |  |
| <i>Paradoxostoma</i> ? spp.                           | 19 |  |  |  | 0  | 266 |  | 3  | 3  |  |  | 41  |  |  |  |  |   |  |  |
| <i>Patagonacythere dubia</i> (Brady 1868)             | 39 |  |  |  | 6  | 169 |  | 10 | 9  |  |  | 52  |  |  |  |  |   |  |  |
| <i>Patagonacythere robusta</i> Tabuki 1986            | 40 |  |  |  | 2  | 119 |  | 2  | 5  |  |  | 76  |  |  |  |  |   |  |  |
| <i>Pedicythere</i> spp.                               | 30 |  |  |  | 1  | 82  |  | 8  | 11 |  |  | 97  |  |  |  |  |   |  |  |
| <i>Polycopse</i> spp.                                 | 50 |  |  |  | 6  | 121 |  | 1  | 6  |  |  | 158 |  |  |  |  | 1 |  |  |
| <i>Pontocythere</i> spp.                              | 20 |  |  |  | 3  | 30  |  | 0  | 4  |  |  | 104 |  |  |  |  |   |  |  |
| <i>Propontocypris</i> sp.                             | 25 |  |  |  | 2  | 34  |  | 0  | 4  |  |  | 105 |  |  |  |  |   |  |  |
| <i>Pseudocythere caudata</i> Sars 1866                | 6  |  |  |  | 0  | 26  |  | 0  | 4  |  |  | 122 |  |  |  |  |   |  |  |
| <i>Pteroloxa chaunensis</i> Schornikov and Zenina 200 | 8  |  |  |  | 1  | 40  |  | 1  | 4  |  |  | 99  |  |  |  |  |   |  |  |
| <i>Pterygocythereis mucronata</i> (Sars 1866)         | 19 |  |  |  | 2  | 63  |  | 5  | 5  |  |  | 49  |  |  |  |  |   |  |  |
| <i>Rabilimis mirabilis</i> (Brady 1868)               | 7  |  |  |  | 8  | 182 |  | 4  | 8  |  |  | 12  |  |  |  |  |   |  |  |
| <i>Rabilimis septentrionalis</i> (Brady 1866)         | 16 |  |  |  | 10 | 222 |  | 4  | 21 |  |  | 10  |  |  |  |  |   |  |  |
| <i>Robertsonites tuberculatus</i> (Sars 1866)         | 2  |  |  |  | 6  | 147 |  | 3  | 29 |  |  | 0   |  |  |  |  |   |  |  |
| <i>Roundstonia globulifera</i> (Brady 1868)           | 10 |  |  |  | 8  | 174 |  | 2  | 37 |  |  | 0   |  |  |  |  | 1 |  |  |
| <i>Sarsicytheridea bradleyi</i> (Norman 1865)         | 8  |  |  |  | 9  | 216 |  | 2  | 56 |  |  | 0   |  |  |  |  |   |  |  |
| <i>Sarsicytheridea macrolaminata</i> (Elofson 1939)   | 8  |  |  |  | 2  | 173 |  | 1  | 13 |  |  | 1   |  |  |  |  |   |  |  |
|                                                       | 5  |  |  |  | 0  | 349 |  | 0  | 55 |  |  | 0   |  |  |  |  |   |  |  |

|  |    |  |  |  |    |     |  |   |     |  |  |     |  |  |  |  |  |
|--|----|--|--|--|----|-----|--|---|-----|--|--|-----|--|--|--|--|--|
|  | 3  |  |  |  | 1  | 178 |  | 1 | 3   |  |  | 1   |  |  |  |  |  |
|  | 0  |  |  |  | 5  | 200 |  | 0 | 5   |  |  | 0   |  |  |  |  |  |
|  | 2  |  |  |  | 7  | 144 |  | 0 | 9   |  |  | 0   |  |  |  |  |  |
|  | 8  |  |  |  | 4  | 196 |  | 0 | 10  |  |  | 0   |  |  |  |  |  |
|  | 1  |  |  |  | 12 | 256 |  | 0 | 0   |  |  | 0   |  |  |  |  |  |
|  | 0  |  |  |  | 14 | 181 |  | 0 | 35  |  |  | 3   |  |  |  |  |  |
|  | 5  |  |  |  | 14 | 474 |  | 1 | 110 |  |  | 3   |  |  |  |  |  |
|  | 10 |  |  |  | 12 | 208 |  | 0 | 50  |  |  | 0   |  |  |  |  |  |
|  | 1  |  |  |  | 2  | 173 |  | 1 | 11  |  |  | 3   |  |  |  |  |  |
|  | 1  |  |  |  | 8  | 323 |  | 4 | 4   |  |  | 8   |  |  |  |  |  |
|  | 0  |  |  |  | 2  | 304 |  | 2 | 10  |  |  | 19  |  |  |  |  |  |
|  | 0  |  |  |  | 1  | 117 |  | 1 | 6   |  |  | 19  |  |  |  |  |  |
|  | 13 |  |  |  | 6  | 721 |  | 3 | 15  |  |  | 110 |  |  |  |  |  |
|  | 4  |  |  |  | 1  | 134 |  | 1 | 2   |  |  | 52  |  |  |  |  |  |

[illegible]

|  |  |   |  |   |  |  |   |  |  |  |   |  |       |                 |   |
|--|--|---|--|---|--|--|---|--|--|--|---|--|-------|-----------------|---|
|  |  |   |  |   |  |  |   |  |  |  |   |  | 301   |                 | 0 |
|  |  |   |  |   |  |  |   |  |  |  | 1 |  | 306   | Bythocythere    | 0 |
|  |  |   |  |   |  |  |   |  |  |  | 2 |  | 306   | Bythocythere    | 0 |
|  |  |   |  |   |  |  |   |  |  |  |   |  | 336   |                 | 0 |
|  |  |   |  |   |  |  |   |  |  |  | 7 |  | 447   | Bythocythere    | 0 |
|  |  |   |  |   |  |  |   |  |  |  | 2 |  | 346   | Bythocythere    | 0 |
|  |  | 1 |  |   |  |  |   |  |  |  |   |  | 882   | Cytheropteron s | 0 |
|  |  |   |  |   |  |  |   |  |  |  |   |  | 438   | Cytheropteron s | 0 |
|  |  |   |  |   |  |  |   |  |  |  |   |  | 301   |                 | 0 |
|  |  |   |  |   |  |  |   |  |  |  |   |  | 501   |                 | 0 |
|  |  |   |  | 1 |  |  | 2 |  |  |  |   |  | 502   |                 | 0 |
|  |  |   |  |   |  |  |   |  |  |  |   |  | 302   |                 | 0 |
|  |  |   |  |   |  |  |   |  |  |  | 1 |  | 1283  | Bythocythere    | 0 |
|  |  |   |  |   |  |  |   |  |  |  |   |  | 307   |                 | 0 |
|  |  |   |  |   |  |  |   |  |  |  |   |  | 13767 | TOTAL           |   |



[illegible]

|                                                                     |   |   |   |   |   |   |     |   |   |   |   |   |   |   |   |     |     |   |   |
|---------------------------------------------------------------------|---|---|---|---|---|---|-----|---|---|---|---|---|---|---|---|-----|-----|---|---|
| <i>Cytheropteron inflatum</i> Brady, Crosskey & Robert 2004         | 0 | 0 | 0 | 0 | 0 | 0 | 1.3 | 0 | 0 | 0 | 0 | 0 | 0 | 0 | 0 | 9.4 | 0.3 | 0 | 0 |
| <i>Cytheropteron laptevensis</i> Stepanova 2004                     | 0 | 0 | 0 | 0 | 0 | 0 | 1.1 | 0 | 0 | 0 | 0 | 0 | 0 | 0 | 0 | 10  | 0   | 0 | 0 |
| <i>Cytheropteron latissimum</i> (Norman 1865)                       | 0 | 0 | 0 | 0 | 0 | 0 | 2.6 | 0 | 0 | 0 | 0 | 0 | 0 | 0 | 0 | 18  | 0   | 0 | 0 |
| <i>Cytheropteron montrosiense</i> Brady, Crosskey & Eynon 1999      | 0 | 0 | 0 | 0 | 0 | 0 | 4.7 | 0 | 0 | 0 | 0 | 0 | 0 | 0 | 0 | 14  | 0   | 0 | 0 |
| <i>Cytheropteron nodosoalatum</i> Neale and Howe 1999               | 0 | 0 | 0 | 0 | 0 | 0 | 6.7 | 0 | 0 | 0 | 0 | 0 | 0 | 0 | 0 | 25  | 0   | 0 | 0 |
| <i>Cytheropteron nodosum</i> Brady 1868                             | 0 | 0 | 0 | 0 | 0 | 0 | 7.8 | 0 | 0 | 0 | 0 | 0 | 0 | 0 | 0 | 17  | 0   | 0 | 0 |
| <i>Cytheropteron parahamatum</i> Yasuhara, Stepanova and Eynon 2004 | 0 | 0 | 0 | 0 | 0 | 0 | 6.6 | 0 | 0 | 0 | 0 | 0 | 0 | 0 | 0 | 12  | 0.3 | 0 | 0 |
| <i>Cytheropteron paralatissimum</i> Swain 1963                      | 0 | 0 | 0 | 0 | 0 | 0 | 8.9 | 0 | 0 | 0 | 0 | 0 | 0 | 0 | 0 | 13  | 0.3 | 0 | 0 |
| <i>Cytheropteron pararcicum</i> Whatley and Masson 1987             | 0 | 0 | 0 | 0 | 0 | 0 | 8   | 0 | 0 | 0 | 0 | 0 | 0 | 0 | 0 | 9.3 | 0   | 0 | 0 |
| <i>Cytheropteron perlaria</i> Hao 1988                              | 0 | 0 | 0 | 0 | 0 | 0 | 15  | 0 | 0 | 0 | 0 | 0 | 0 | 0 | 0 | 13  | 0   | 0 | 0 |
| <i>Cytheropteron porterae</i> Whatley and Coles 1987                | 0 | 0 | 0 | 0 | 0 | 0 | 24  | 0 | 0 | 0 | 0 | 0 | 0 | 0 | 0 | 8.5 | 0   | 0 | 0 |
| <i>Cytheropteron pseudoinflatum</i> Whatley and Eynon 1999          | 0 | 0 | 0 | 0 | 0 | 0 | 17  | 0 | 0 | 0 | 0 | 0 | 0 | 0 | 0 | 14  | 0.5 | 0 | 0 |
| <i>Cytheropteron pseudomontrosiense</i> Whatley and Eynon 1999      | 0 | 0 | 0 | 0 | 0 | 0 | 12  | 0 | 0 | 0 | 0 | 0 | 0 | 0 | 0 | 13  | 1.1 | 0 | 0 |
| <i>Cytheropteron pyramidale</i> Brady 1868                          | 0 | 0 | 0 | 0 | 0 | 0 | 11  | 0 | 0 | 0 | 0 | 0 | 0 | 0 | 0 | 10  | 3   | 0 | 0 |
| <i>Cytheropteron scoresbyi</i> Whatley and Eynon 1999               | 0 | 0 | 0 | 0 | 0 | 0 | 5   | 0 | 0 | 0 | 0 | 0 | 0 | 0 | 0 | 8.9 | 2.3 | 0 | 0 |
| <i>Cytheropteron sedovi</i> Schneider 1969                          | 0 | 0 | 0 | 0 | 0 | 0 | 3.1 | 0 | 0 | 0 | 0 | 0 | 0 | 0 | 0 | 7.2 | 4.9 | 0 | 0 |
| <i>Cytheropteron sulense</i> Lev 1972                               | 0 | 0 | 0 | 0 | 0 | 0 | 3.3 | 0 | 0 | 0 | 0 | 0 | 0 | 0 | 0 | 6.3 | 13  | 0 | 0 |
| <i>Cytheropteron suzdalskyi</i> Lev 1972                            | 0 | 0 | 0 | 0 | 0 | 0 | 1.6 | 0 | 0 | 0 | 0 | 0 | 0 | 0 | 0 | 6.4 | 16  | 0 | 0 |

|     |   |   |   |   |   |     |   |   |   |   |   |   |   |     |     |   |     |
|-----|---|---|---|---|---|-----|---|---|---|---|---|---|---|-----|-----|---|-----|
| 0   | 0 | 0 | 0 | 0 | 0 | 1   | 0 | 0 | 0 | 0 | 0 | 0 | 0 | 9.6 | 17  | 0 | 0   |
| 0   | 0 | 0 | 0 | 0 | 0 | 0   | 0 | 0 | 0 | 0 | 0 | 0 | 0 | 6.2 | 12  | 0 | 0   |
| 0   | 0 | 0 | 0 | 0 | 0 | 2.3 | 0 | 0 | 0 | 0 | 0 | 0 | 0 | 17  | 12  | 0 | 0   |
| 0   | 0 | 0 | 0 | 0 | 0 | 1.8 | 0 | 0 | 0 | 0 | 0 | 0 | 0 | 9.8 | 11  | 0 | 0   |
| 0   | 0 | 0 | 0 | 0 | 0 | 0.4 | 0 | 0 | 0 | 0 | 0 | 0 | 0 | 11  | 13  | 0 | 0   |
| 0   | 0 | 0 | 0 | 0 | 0 | 0   | 0 | 0 | 0 | 0 | 0 | 0 | 0 | 8.1 | 11  | 0 | 0   |
| 0.1 | 0 | 0 | 0 | 0 | 0 | 0.3 | 0 | 0 | 0 | 0 | 0 | 0 | 0 | 9.6 | 9.3 | 0 | 0   |
| 0   | 0 | 0 | 0 | 0 | 0 | 0.5 | 0 | 0 | 0 | 0 | 0 | 0 | 0 | 12  | 11  | 0 | 0   |
| 0   | 0 | 0 | 0 | 0 | 0 | 0   | 0 | 0 | 0 | 0 | 0 | 0 | 0 | 9.3 | 16  | 0 | 0   |
| 0   | 0 | 0 | 0 | 0 | 0 | 0   | 0 | 0 | 0 | 0 | 0 | 0 | 0 | 7.6 | 11  | 0 | 0   |
| 0   | 0 | 0 | 0 | 0 | 0 | 0   | 0 | 0 | 0 | 0 | 0 | 0 | 0 | 5.2 | 11  | 0 | 0   |
| 0   | 0 | 0 | 0 | 0 | 0 | 0.7 | 0 | 0 | 0 | 0 | 0 | 0 | 0 | 9.3 | 19  | 0 | 0   |
| 0   | 0 | 0 | 0 | 0 | 0 | 0   | 0 | 0 | 0 | 0 | 0 | 0 | 0 | 2.1 | 9   | 0 | 0.2 |
| 0   | 0 | 0 | 0 | 0 | 0 | 0   | 0 | 0 | 0 | 0 | 0 | 0 | 0 | 2.6 | 13  | 0 | 0   |





[illegible]

|                                                        |   |   |   |     |     |   |     |   |   |   |   |   |   |     |   |   |   |     |
|--------------------------------------------------------|---|---|---|-----|-----|---|-----|---|---|---|---|---|---|-----|---|---|---|-----|
| <i>Heterocyprideis sorbyana</i> (Jones 1857)           |   |   |   |     |     |   |     |   |   |   |   |   |   |     |   |   |   |     |
| <i>Jonesia acuminata</i> (Sars 1866) sensu lato        |   |   |   |     |     |   |     |   |   |   |   |   |   |     |   |   |   |     |
| <i>Kotoracythere arctoborealis</i> Schornikov and Zel  |   |   |   |     |     |   |     |   |   |   |   |   |   |     |   |   |   |     |
| <i>Krithe hunti</i> Yasuhara, Stepanova, Okahashi, Cro |   |   |   |     |     |   |     |   |   |   |   |   |   |     |   |   |   |     |
| <i>Krithe minima</i> Coles, Whatley, & Moguilevsky 199 |   |   |   |     |     |   |     |   |   |   |   |   |   |     |   |   |   |     |
| <i>Loxoconcha venepidermoidea</i> Swain 1963           |   |   |   |     |     |   |     |   |   |   |   |   |   |     |   |   |   |     |
| <i>Microcythere medistriata</i> (Joy and Clark 1977)   |   |   |   |     |     |   |     |   |   |   |   |   |   |     |   |   |   |     |
| <i>Microcytherura</i> sp.                              |   |   |   |     |     |   |     |   |   |   |   |   |   |     |   |   |   |     |
| <i>Muellerina abyssicola</i> (Sars 1866)               |   |   |   |     |     |   |     |   |   |   |   |   |   |     |   |   |   |     |
| <i>Munseyella kiklukhensis</i> (Brouwers 1990)         |   |   |   |     |     |   |     |   |   |   |   |   |   |     |   |   |   |     |
| <i>Normanicythere leioderma</i> (Norman 1869)          |   |   |   |     |     |   |     |   |   |   |   |   |   |     |   |   |   |     |
| <i>Palmenella limicola</i> (Norman 1865)               |   |   |   |     |     |   |     |   |   |   |   |   |   |     |   |   |   |     |
| <i>Paracyprideis pseudopunctillata</i> Swain 1963      |   |   |   |     |     |   |     |   |   |   |   |   |   |     |   |   |   |     |
| <i>Paracytheroïs</i> spp.                              |   |   |   |     |     |   |     |   |   |   |   |   |   |     |   |   |   |     |
| <i>Paradoxostoma</i> ? spp.                            |   |   |   |     |     |   |     |   |   |   |   |   |   |     |   |   |   |     |
| <i>Patagonacythere dubia</i> (Brady 1868)              |   |   |   |     |     |   |     |   |   |   |   |   |   |     |   |   |   |     |
| <i>Patagonacythere robusta</i> Tabuki 1986             |   |   |   |     |     |   |     |   |   |   |   |   |   |     |   |   |   |     |
| <i>Pedicythere</i> spp.                                |   |   |   |     |     |   |     |   |   |   |   |   |   |     |   |   |   |     |
|                                                        | 0 | 0 | 0 | 1.4 | 0   | 0 | 0.7 | 0 | 0 | 0 | 0 | 0 | 0 | 0.9 | 0 | 0 | 0 | 0.3 |
|                                                        | 0 | 0 | 0 | 2.1 | 0   | 0 | 0.8 | 0 | 0 | 0 | 0 | 0 | 0 | 3.6 | 0 | 0 | 0 | 0   |
|                                                        | 0 | 0 | 0 | 2.1 | 0   | 0 | 0.2 | 0 | 0 | 0 | 0 | 0 | 0 | 6.8 | 0 | 0 | 0 | 1   |
|                                                        | 0 | 0 | 0 | 1   | 0   | 0 | 0.8 | 0 | 0 | 0 | 0 | 0 | 0 | 8.1 | 0 | 0 | 0 | 0.4 |
|                                                        | 0 | 0 | 0 | 2.4 | 0   | 0 | 0   | 0 | 0 | 0 | 0 | 0 | 0 | 5.2 | 0 | 0 | 0 | 0.2 |
|                                                        | 0 | 0 | 0 | 3.1 | 0   | 0 | 0.1 | 0 | 0 | 0 | 0 | 0 | 0 | 7.3 | 0 | 0 | 0 | 0.9 |
|                                                        | 0 | 0 | 0 | 7.6 | 0   | 0 | 0   | 0 | 0 | 0 | 0 | 0 | 0 | 6.6 | 0 | 0 | 0 | 1   |
|                                                        | 0 | 0 | 0 | 6.8 | 0.8 | 0 | 0.3 | 0 | 0 | 0 | 0 | 0 | 0 | 6.8 | 0 | 0 | 0 | 0.5 |
|                                                        | 0 | 0 | 0 | 7.3 | 2   | 0 | 0   | 0 | 0 | 0 | 0 | 0 | 0 | 2   | 0 | 0 | 0 | 0   |
|                                                        | 0 | 0 | 0 | 9   | 0   | 0 | 0   | 0 | 0 | 0 | 0 | 0 | 0 | 2.7 | 0 | 0 | 0 | 0.3 |
|                                                        | 0 | 0 | 0 | 5.9 | 0   | 0 | 0.3 | 0 | 0 | 0 | 0 | 0 | 0 | 6.2 | 0 | 0 | 0 | 0.7 |
|                                                        | 0 | 0 | 0 | 1   | 0   | 0 | 1.8 | 0 | 0 | 0 | 0 | 0 | 0 | 1.8 | 0 | 0 | 0 | 2   |
|                                                        | 0 | 0 | 0 | 0   | 0   | 0 | 2.2 | 0 | 0 | 0 | 0 | 0 | 0 | 3.5 | 0 | 0 | 0 | 2.2 |
|                                                        | 0 | 0 | 0 | 0.3 | 0   | 0 | 5   | 0 | 0 | 0 | 0 | 0 | 0 | 0.7 | 0 | 0 | 0 | 2   |
|                                                        | 0 | 0 | 0 | 0.3 | 0   | 0 | 1.3 | 0 | 0 | 0 | 0 | 0 | 0 | 3.3 | 0 | 0 | 0 | 2.6 |
|                                                        | 0 | 0 | 0 | 0.5 | 0   | 0 | 2.8 | 0 | 0 | 0 | 0 | 0 | 0 | 2.1 | 0 | 0 | 0 | 2.3 |
|                                                        | 0 | 0 | 0 | 1   | 0   | 0 | 4   | 0 | 0 | 0 | 0 | 0 | 0 | 2.7 | 0 | 0 | 0 | 0.7 |
|                                                        | 0 | 0 | 0 | 0.3 | 0   | 0 | 2.4 | 0 | 0 | 0 | 0 | 0 | 0 | 0.8 | 0 | 0 | 0 | 0   |

|   |   |   |     |   |   |     |   |   |   |   |   |   |     |   |   |   |     |
|---|---|---|-----|---|---|-----|---|---|---|---|---|---|-----|---|---|---|-----|
| 0 | 0 | 0 | 0.3 | 0 | 0 | 5.3 | 0 | 0 | 0 | 0 | 0 | 0 | 1   | 0 | 0 | 0 | 0.3 |
| 0 | 0 | 0 | 0.3 | 0 | 0 | 2.6 | 0 | 0 | 0 | 0 | 0 | 0 | 0   | 0 | 0 | 0 | 1.6 |
| 0 | 0 | 0 | 0.3 | 0 | 0 | 5.6 | 0 | 0 | 0 | 0 | 0 | 0 | 0.7 | 0 | 0 | 0 | 2.3 |
| 0 | 0 | 0 | 0.6 | 0 | 0 | 5.4 | 0 | 0 | 0 | 0 | 0 | 0 | 2.4 | 0 | 0 | 0 | 1.2 |
| 0 | 0 | 0 | 0.4 | 0 | 0 | 6.9 | 0 | 0 | 0 | 0 | 0 | 0 | 0.2 | 0 | 0 | 0 | 2.7 |
| 0 | 0 | 0 | 0.6 | 0 | 0 | 3.8 | 0 | 0 | 0 | 0 | 0 | 0 | 0   | 0 | 0 | 0 | 4   |
| 0 | 0 | 0 | 0.3 | 0 | 0 | 5   | 0 | 0 | 0 | 0 | 0 | 0 | 0.6 | 0 | 0 | 0 | 1.6 |
| 0 | 0 | 0 | 1.1 | 0 | 0 | 3.4 | 0 | 0 | 0 | 0 | 0 | 0 | 2.3 | 0 | 0 | 0 | 2.7 |
| 0 | 0 | 0 | 1.7 | 0 | 0 | 4.7 | 0 | 0 | 0 | 0 | 0 | 0 | 0.3 | 0 | 0 | 0 | 0.7 |
| 0 | 0 | 0 | 2.8 | 0 | 0 | 5.4 | 0 | 0 | 0 | 0 | 0 | 0 | 0.2 | 0 | 0 | 0 | 1.6 |
| 0 | 0 | 0 | 4.2 | 0 | 0 | 4.8 | 0 | 0 | 0 | 0 | 0 | 0 | 0   | 0 | 0 | 0 | 0.4 |
| 0 | 0 | 0 | 6.6 | 0 | 0 | 7.9 | 0 | 0 | 0 | 0 | 0 | 0 | 0   | 0 | 0 | 0 | 0.3 |
| 0 | 0 | 0 | 7.6 | 0 | 0 | 6.9 | 0 | 0 | 0 | 0 | 0 | 0 | 1   | 0 | 0 | 0 | 0.5 |
| 0 | 0 | 0 | 7.8 | 0 | 0 | 6.2 | 0 | 0 | 0 | 0 | 0 | 0 | 1.3 | 0 | 0 | 0 | 0.3 |



[illegible]



|   |     |   |   |   |     |   |     |
|---|-----|---|---|---|-----|---|-----|
| 0 | 0   | 0 | 0 | 0 | 0   | 0 | 100 |
| 0 | 0   | 0 | 0 | 0 | 0.3 | 0 | 100 |
| 0 | 0   | 0 | 0 | 0 | 0.7 | 0 | 100 |
| 0 | 0   | 0 | 0 | 0 | 0   | 0 | 100 |
| 0 | 0   | 0 | 0 | 0 | 1.6 | 0 | 100 |
| 0 | 0   | 0 | 0 | 0 | 0.6 | 0 | 100 |
| 0 | 0   | 0 | 0 | 0 | 0   | 0 | 100 |
| 0 | 0   | 0 | 0 | 0 | 0   | 0 | 100 |
| 0 | 0   | 0 | 0 | 0 | 0   | 0 | 100 |
| 0 | 0   | 0 | 0 | 0 | 0   | 0 | 100 |
| 0 | 0.4 | 0 | 0 | 0 | 0   | 0 | 100 |
| 0 | 0   | 0 | 0 | 0 | 0   | 0 | 100 |
| 0 | 0   | 0 | 0 | 0 | 0.1 | 0 | 100 |
| 0 | 0   | 0 | 0 | 0 | 0   | 0 | 100 |
