# Supplementary material for: Central Arctic Ocean paleoceanography from ~ 50 ka to present, on the basis of ostracode faunal assemblages from SWERUS 2014 expedition
Source: Copernicus journal article supplement (doi:10.5194/cp-2017-22), 2017-03-28
Supplement: Supplementary file 5 [file Gemery-SuppTables-32GC2-32MC S5- Rabilimis in SWERUS.pdf › Gemery-SuppTables-32GC2-32MC S5- Rabilimis in SWERUS.pdf]

| Year | Cruise    | Sample       |    | Latitude | Longitude | Water depth (m) | Location      |
|------|-----------|--------------|----|----------|-----------|-----------------|---------------|
| 2014 | SWERUS-L2 | <b>2MC4</b>  | 94 | 72.43    | -175.35   | 56              | Chukchi - H   |
| 2014 | SWERUS-L2 | <b>3MC4</b>  | 94 | 72.38    | -175.79   | 90              | Chukchi - H   |
| 2014 | SWERUS-L2 | <b>4MC4</b>  | 94 | 72.86    | -175.71   | 124             | Chukchi - H   |
| 2014 | SWERUS-L2 | <b>8MC4</b>  | 94 | 75.15    | 179.87    | 524             | Mendeleev I   |
| 2014 | SWERUS-L2 | <b>9MC4</b>  | 94 | 75.06    | -179.82   | 446             | Mendeleev I   |
| 2014 | SWERUS-L2 | <b>13MC4</b> | 94 | 76.19    | -179.28   | 1118            | Arlis Plateau |
| 2014 | SWERUS-L2 | <b>14MC4</b> | 94 | 76.37    | 176.43    | 733             | E.Siberian S  |
| 2014 | SWERUS-L2 | <b>15MC4</b> | 94 | 76.32    | 175.88    | 501             | E.Siberian S  |
| 2014 | SWERUS-L2 | <b>16MC4</b> | 94 | 76.51    | 176.63    | 1023            | E.Siberian S  |
| 2014 | SWERUS-L2 | <b>18MC4</b> | 94 | 76.41    | 173.88    | 349             | E.Siberian S  |
| 2014 | SWERUS-L2 | <b>21MC4</b> | 94 | 77.58    | 163.29    | 153             | E.Siberian S  |
| 2014 | SWERUS-L2 | <b>22MC4</b> | 94 | 78.22    | 164.42    | 367             | E.Siberian S  |
| 2014 | SWERUS-L2 | <b>23MC4</b> | 94 | 78.66    | 165.03    | 522             | E.Siberian S  |
| 2014 | SWERUS-L2 | <b>24MC4</b> | 94 | 78.80    | 165.37    | 982             | E.Siberian S  |
| 2014 | SWERUS-L2 | <b>25MC4</b> | 94 | 79.23    | 152.68    | 101             | E.Siberian S  |
| 2014 | SWERUS-L2 | <b>26MC4</b> | 94 | 79.74    | 154.39    | 378             | E.Siberian S  |
| 2014 | SWERUS-L2 | <b>27MC5</b> | 94 | 79.66    | 154.13    | 276             | E.Siberian S  |
| 2014 | SWERUS-L2 | <b>28MC4</b> | 94 | 79.92    | 154.35    | 1145            | E.Siberian S  |
| 2014 | SWERUS-L2 | <b>31MC4</b> | 94 | 79.92    | 143.16    | 1157            | Lomonosov     |
| 2014 | SWERUS-L2 | <b>32MC4</b> | 94 | 85.14    | 151.59    | 837             | Lomonosov     |
| 2014 | SWERUS-L2 | <b>34MC4</b> | 94 | 84.28    | 148.71    | 886             | Lomonosov     |

|               | <i>R. mirabilis</i> | total specimen count | % abundance |  |
|---------------|---------------------|----------------------|-------------|--|
| erald Trough  |                     | 32                   | 0.0         |  |
| erald Trough  |                     | 16                   | 0.0         |  |
| erald Trough  |                     | 15                   | 0.0         |  |
| Ridge, S [slc | 4                   | 18                   | 22.2        |  |
| Ridge, S [slc | 3                   | 30                   | 10.0        |  |
| J             | 2                   | 138                  | 1.4         |  |
| Sea Slope     | 41                  | 59                   | 69.5        |  |
| Sea Slope     | 45                  | 110                  | 40.9        |  |
| Sea Slope     | 11                  | 99                   | 11.1        |  |
| Sea Slope     | 14                  | 80                   | 17.5        |  |
| Sea Slope     | 1                   | 38                   | 2.6         |  |
| Sea Slope     | 18                  | 263                  | 6.8         |  |
| Sea Slope     | 20                  | 515                  | 3.9         |  |
| Sea Slope     |                     | 78                   | 0.0         |  |
| Sea Slope     | 2                   | 19                   | 10.5        |  |
| Sea Slope     | 1                   | 111                  | 0.9         |  |
| Sea Slope     | 6                   | 44                   | 13.6        |  |
| Sea Slope     |                     | 10                   | 0.0         |  |
| Ridge, S      |                     | 7                    | 0.0         |  |
| Ridge         | 59                  | 864                  | 6.8         |  |
| Ridge         |                     | 1063                 | 0.0         |  |
